# Supplementary material
Source: HighWire-hosted journal article supplement (https://erj.ersjournals.com/content/58/1/2003434)

**Supplementary Figure S1:  $\alpha$  Diversity for WGS Metagenome and RNA Metatranscriptome data.** Shannon Index of (A) WGS Metagenome and (B) RNA Metatranscriptome data.

SFigure 1

**A.** WGS Metagenome

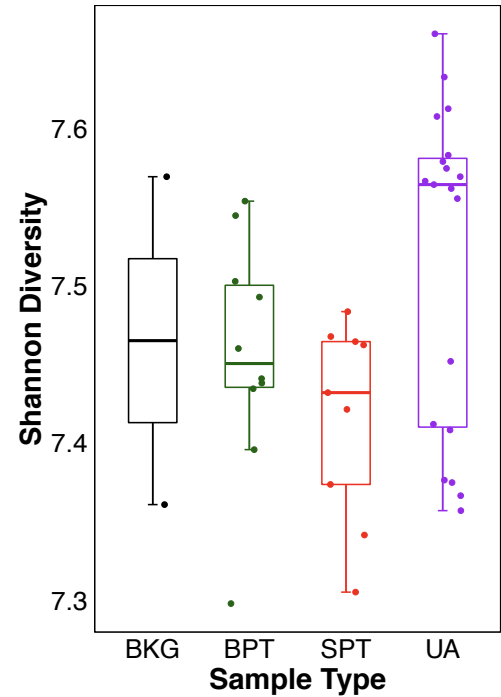

**B.** RNA Metatranscriptome

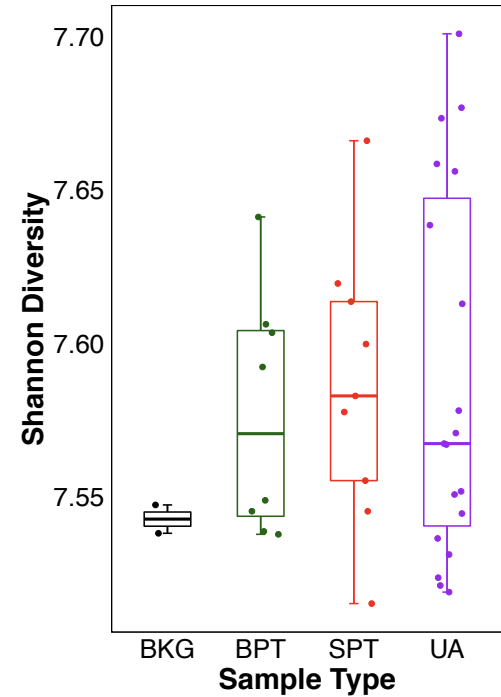

**Supplementary Figure S2: Rarefaction analysis for each sequencing datasets.** Each line represents a sample and the dash line represents the mean for all samples. Sequence depth (x axis) is compared with OTU or KO annotation (y axis). (A) 16S rRNA gene sequencing (B) Whole Genome Sequencing (C) RNA Metatranscriptome.

SFigure 2

Rarefaction Analysis

A. 16S

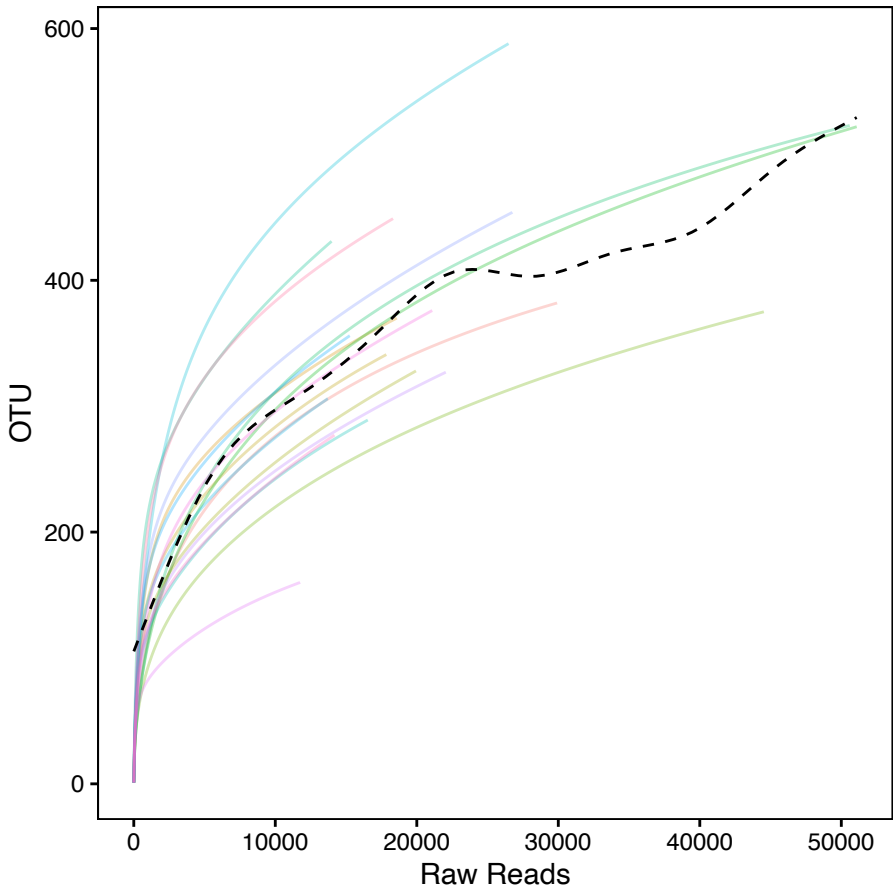

B. WGS

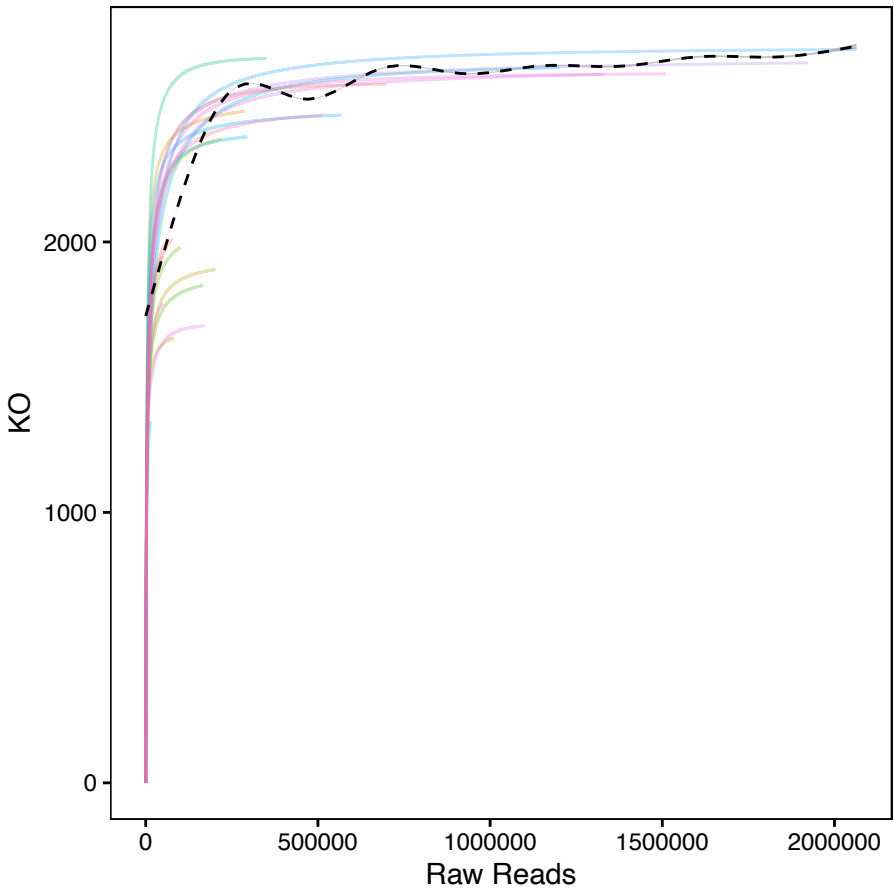

C. RNA

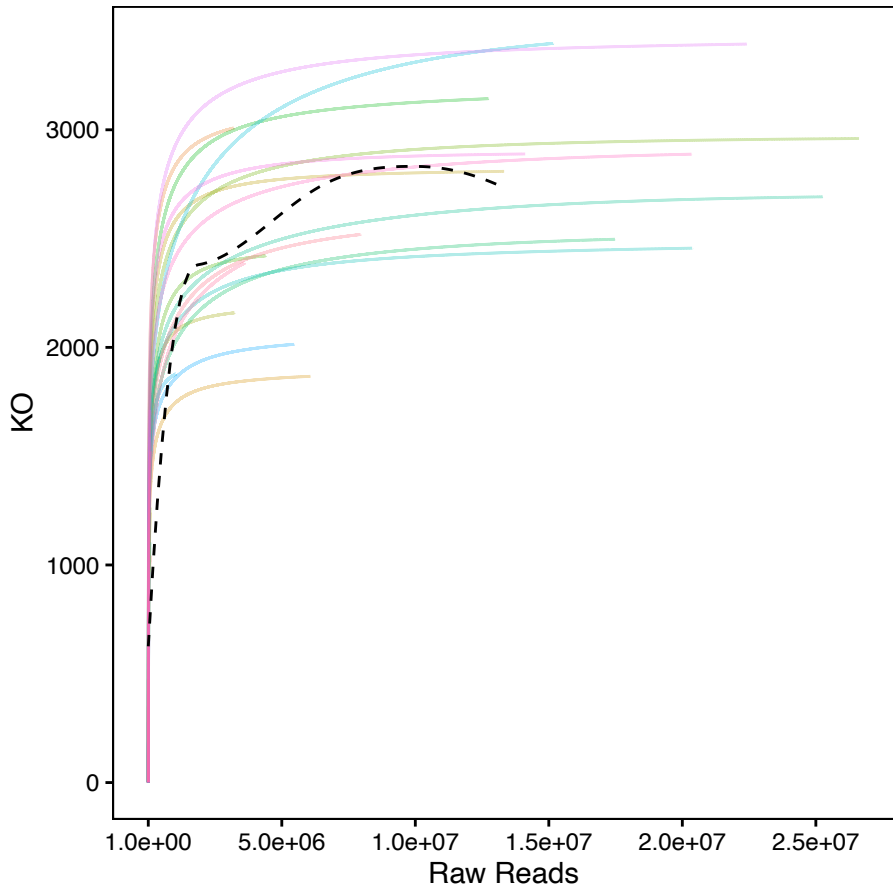

**Supplementary Figure S3: Comparison of global taxonomic composition across different sequencing data types.** PROCRUSTES analysis, using Bray-Curtis Distance matrices, was used to compare taxonomic annotation for the three data types. Monte-Carlo simulation test was used for statistical significance. **(A)** Comparison between 16S rRNA gene sequencing and WGS Metagenome (Monte-Carlo p-value=ns). **(B)** Comparison between 16S rRNA gene sequencing and RNA Metatranscriptome (Monte-Carlo p-value=ns). **(C)** Comparison between WGS Metagenome and RNA Metatranscriptome (Monte-Carlo p-value <0.01).

Taxonomic Annotation

A. 16S vs. WGS

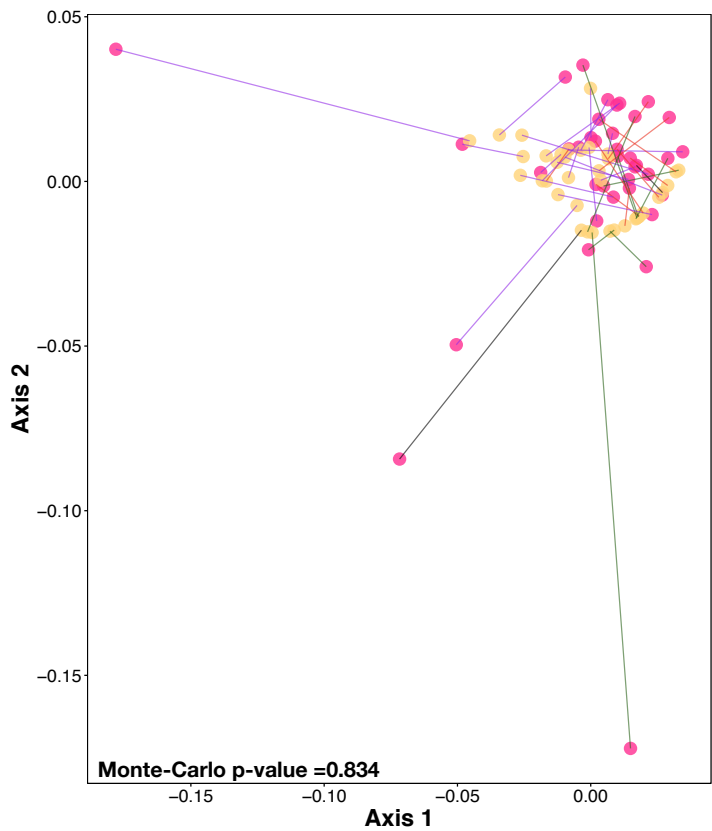

B. 16S vs. RNA

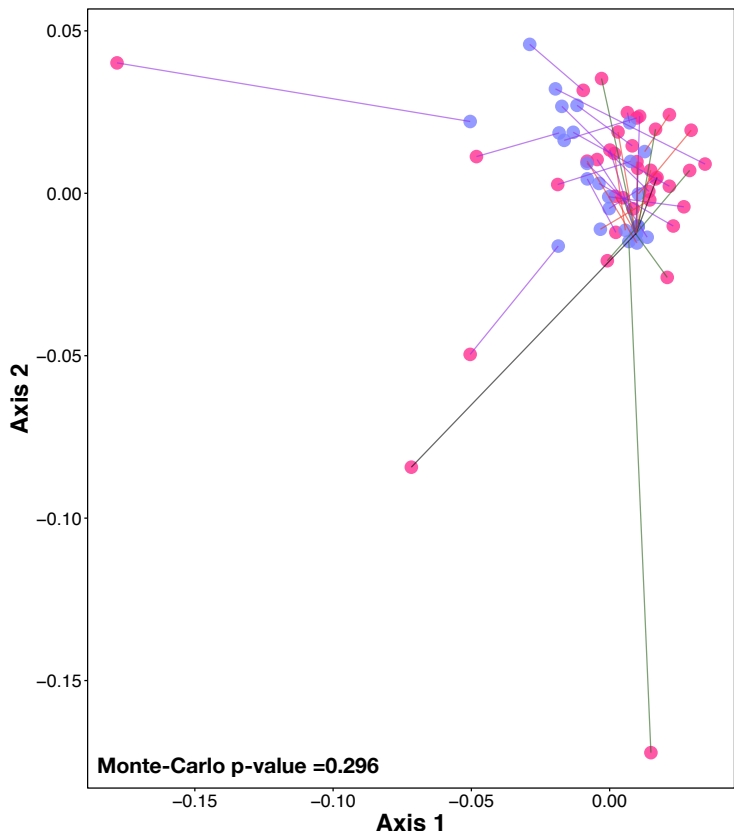

C. WGS vs. RNA

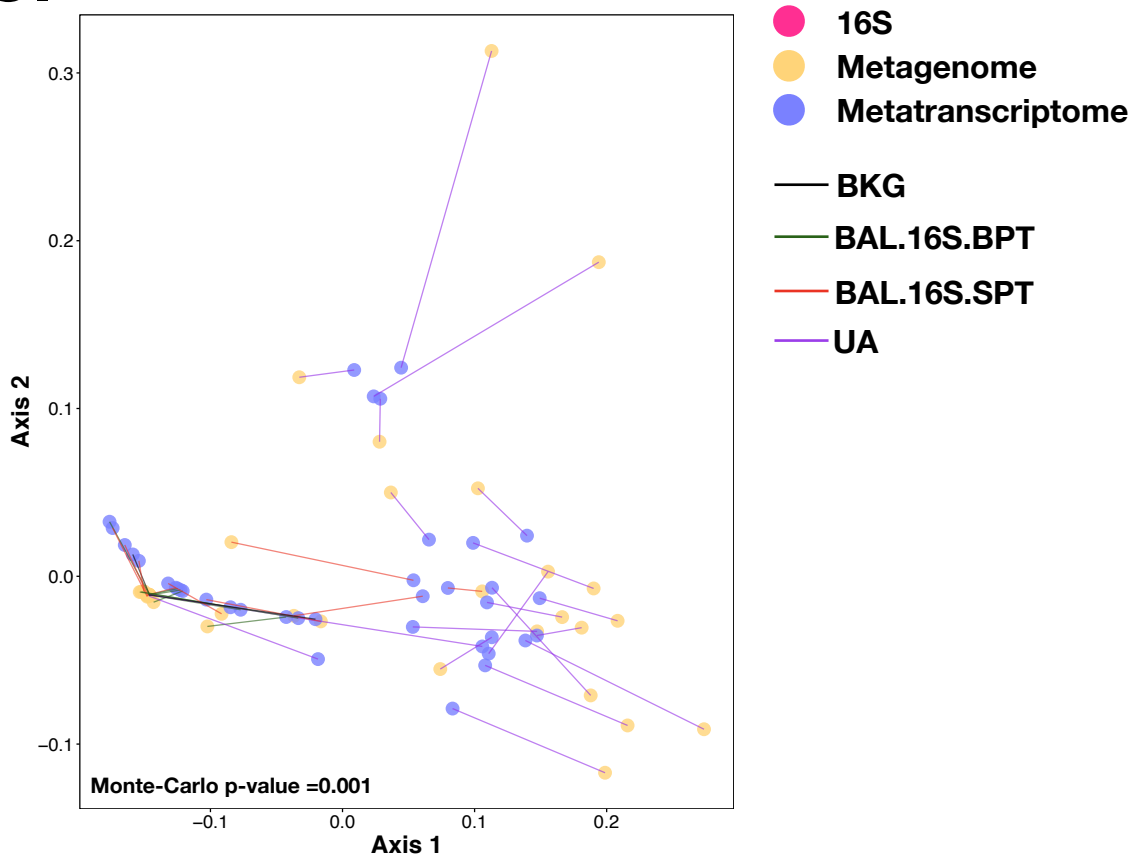

**Supplementary Figure S4: Comparison of global functional composition across different sequencing data types.** PROCRUSTES analysis, with Bray-Curtis Distance matrices, was used to compare functional annotation across the sequencing data types. Monte-Carlo simulation test was used for statistical significance. **(A)** Comparison between 16S rRNA gene sequencing and WGS Metagenome (Monte-Carlo p-value<0.01). **(B)** Comparison between 16S rRNA gene sequencing and RNA Metatranscriptome (Monte-Carlo p-value<0.01). **(C)** Comparison between WGS Metagenome and RNA Metatranscriptome (Monte-Carlo p-value <0.01).

SFigure 4

Functional Annotation

A. 16S vs. WGS

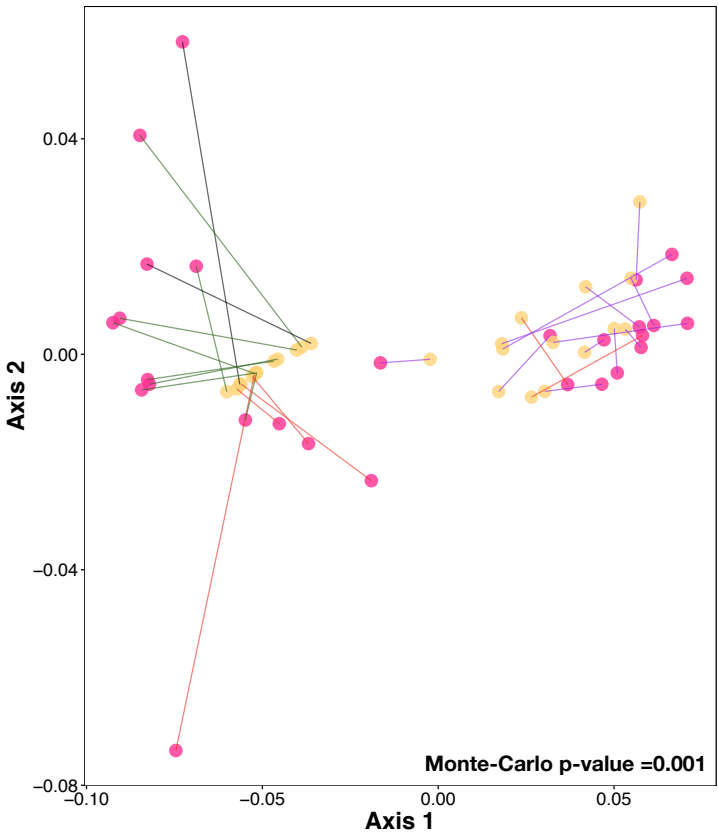

B. 16S vs. RNA

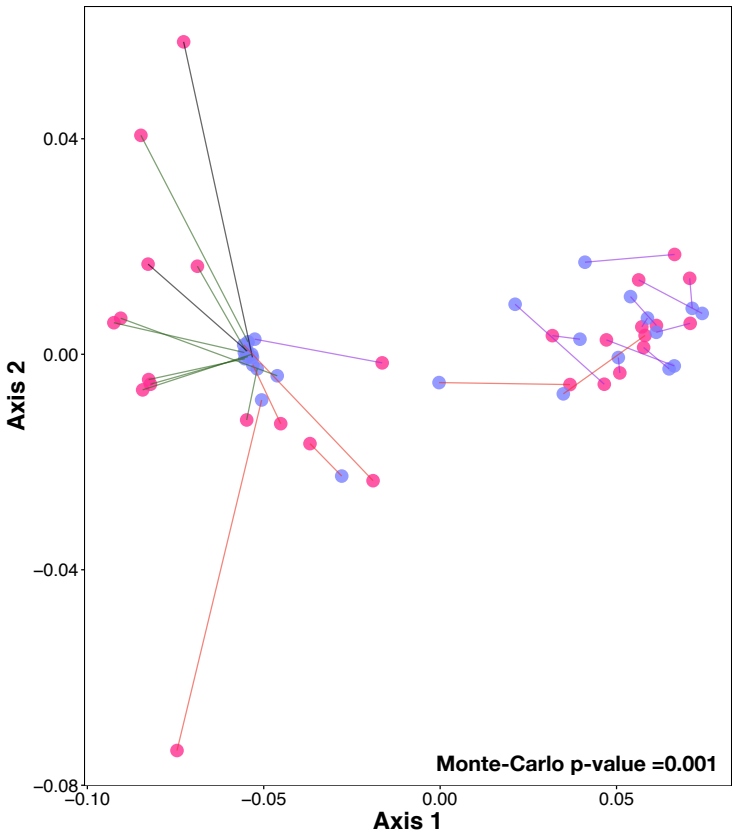

C. WGS vs. RNA

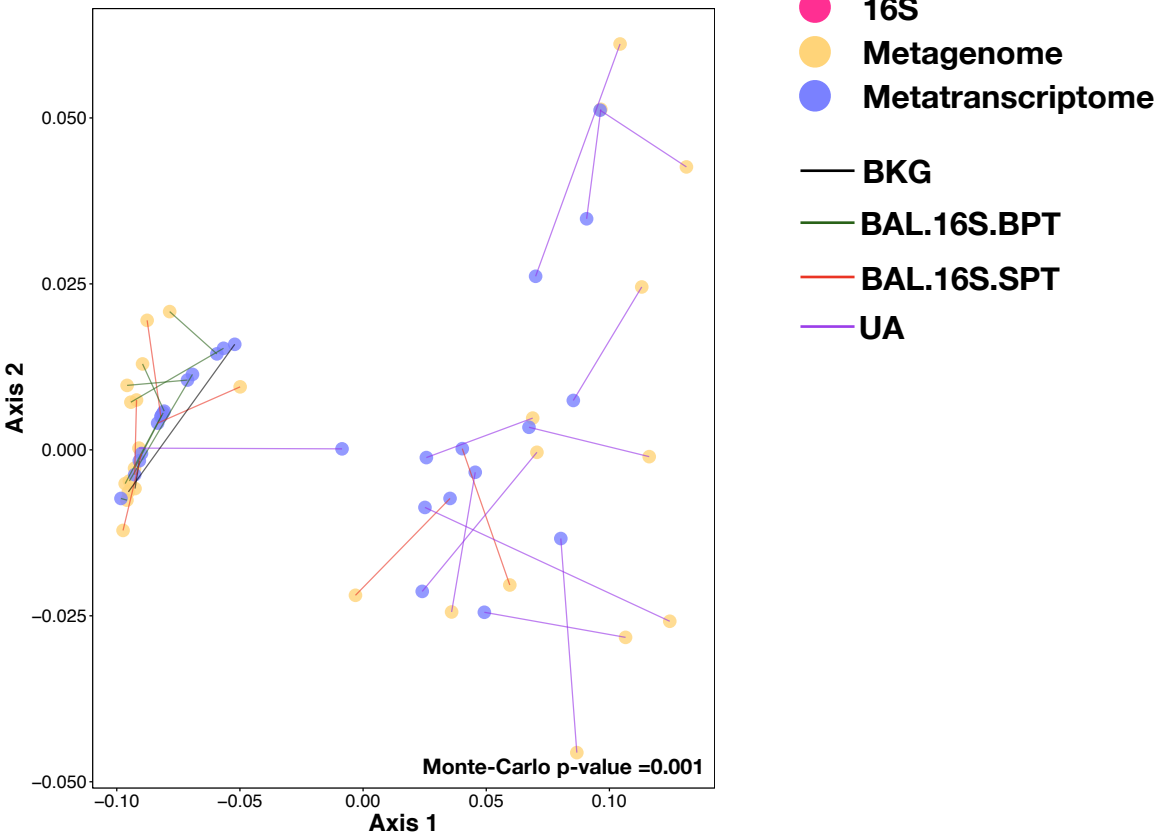



**Supplementary Figure S5: Functional signatures identified as differentially enriched in BAL.SPT on WGS Metagenome and RNA Metatranscriptome data.**

DESEQ2 analysis of WGS Metagenome (**A**) and RNA Metatranscriptome (**B**) functional annotation identified KOs differentially enriched in BAL.16S.SPT vs. BAL.BPT.16S samples (FDR<0.05). Circle size is representative of KEGG Expression.

SFigure 5

A. WGS Metagenome

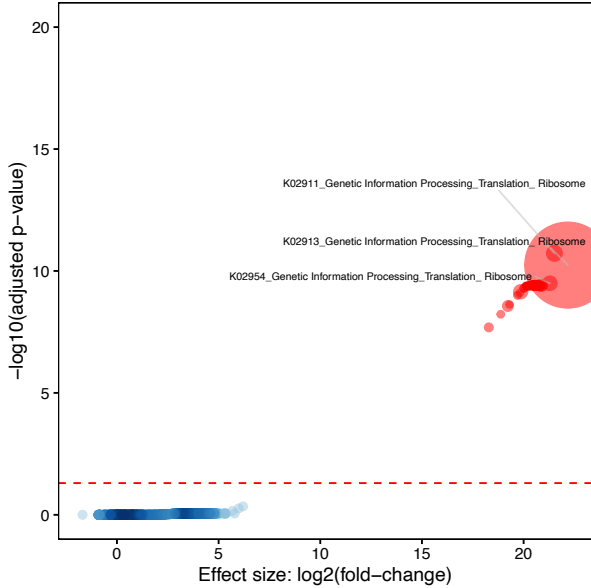

Up Regulated in SPT

B. RNA Metatranscriptome

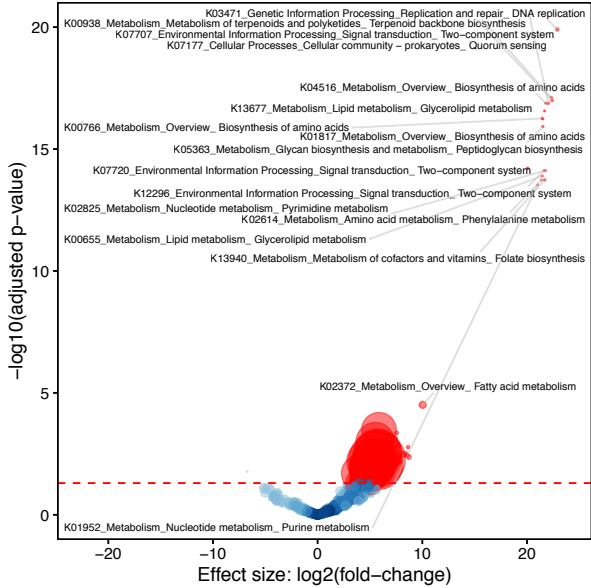

Up Regulated in SPT

**Supplementary Figure S6: Ex-Vivo measurement of Short Chain Fatty Acids (SCFAs) levels.** (A) Levels of SCFAs in supernatant of *Veillonella parvula* in culture media were compared with media alone. Longitudinal change in levels of Butyrate (**B**) or Propionate (**C**) after ex vivo addition to BAL cells.

SFigure 6

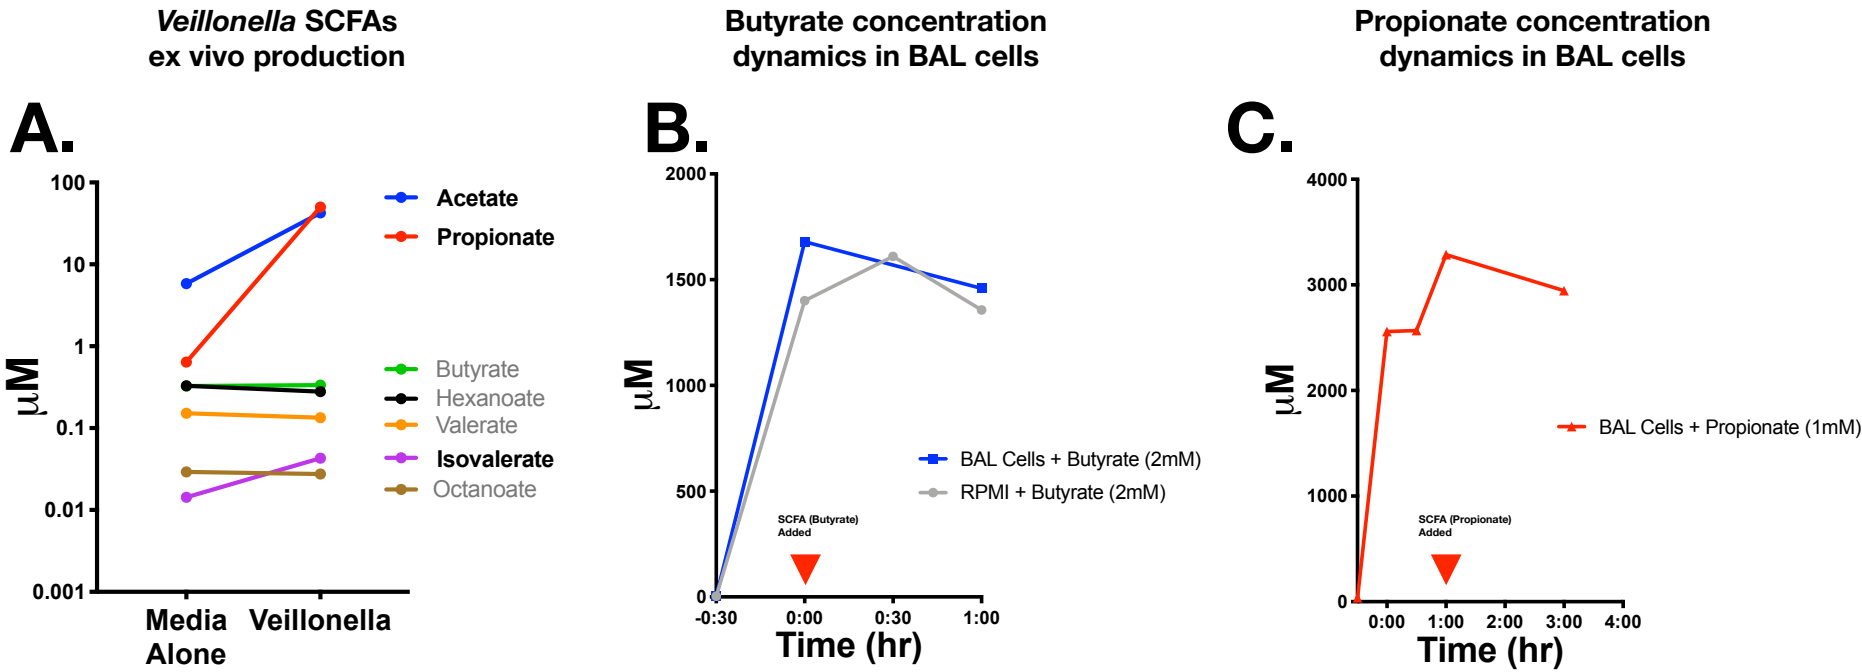

**Supplementary Figure S7: Comparison of levels of SCFAs in UA and BAL samples.**

Correlation analysis using spearman rho showed no significant association between levels of SCFAs detected in UA and BAL samples.

SFigure 7

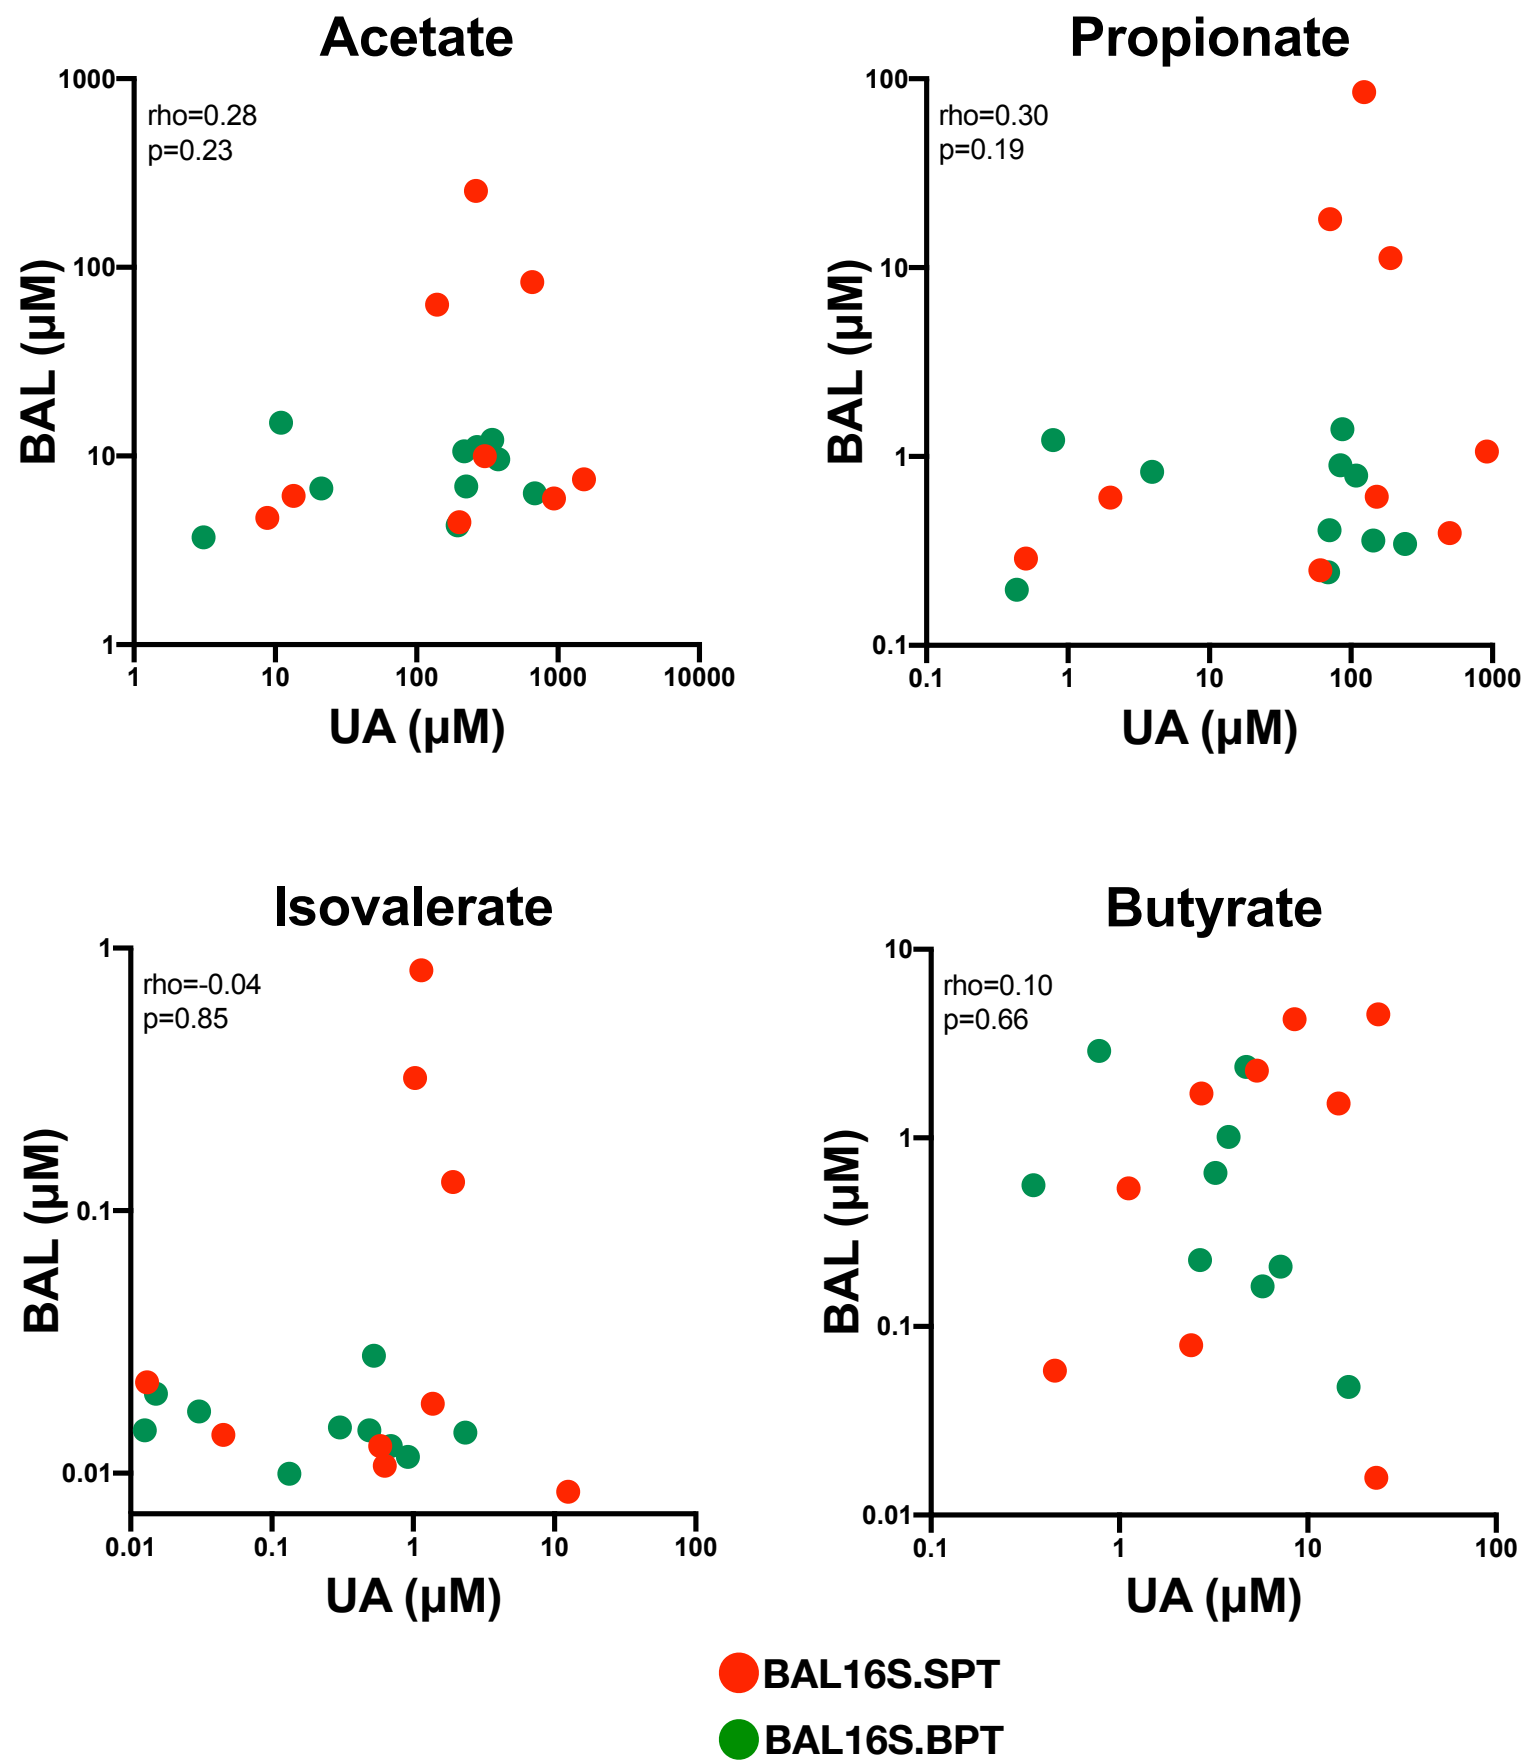

**Supplementary Figure S8: Clustering of WGS Metagenome and RNA Metatranscriptome:** Dirichlet Multinomial Modelling (DMM) of all samples was performed separately for WGS Metagenome (**A**) and RNA Metatranscriptome (**C**). In both cases, 2 clusters were identified as the best model fit. Principle Co-ordinate analysis of WGS metagenome (**B**), based on Bray-Curtis Distance, using DMM clustering of BAL samples showed that only three BAL Samples clustered with UA samples. Principle Co-ordinate analysis of RNA metatranscriptome (**C**), based on Bray-Curtis Distance, using DMM clustering of BAL samples showed that only two BAL Samples clustered with UA samples.

SFigure 8

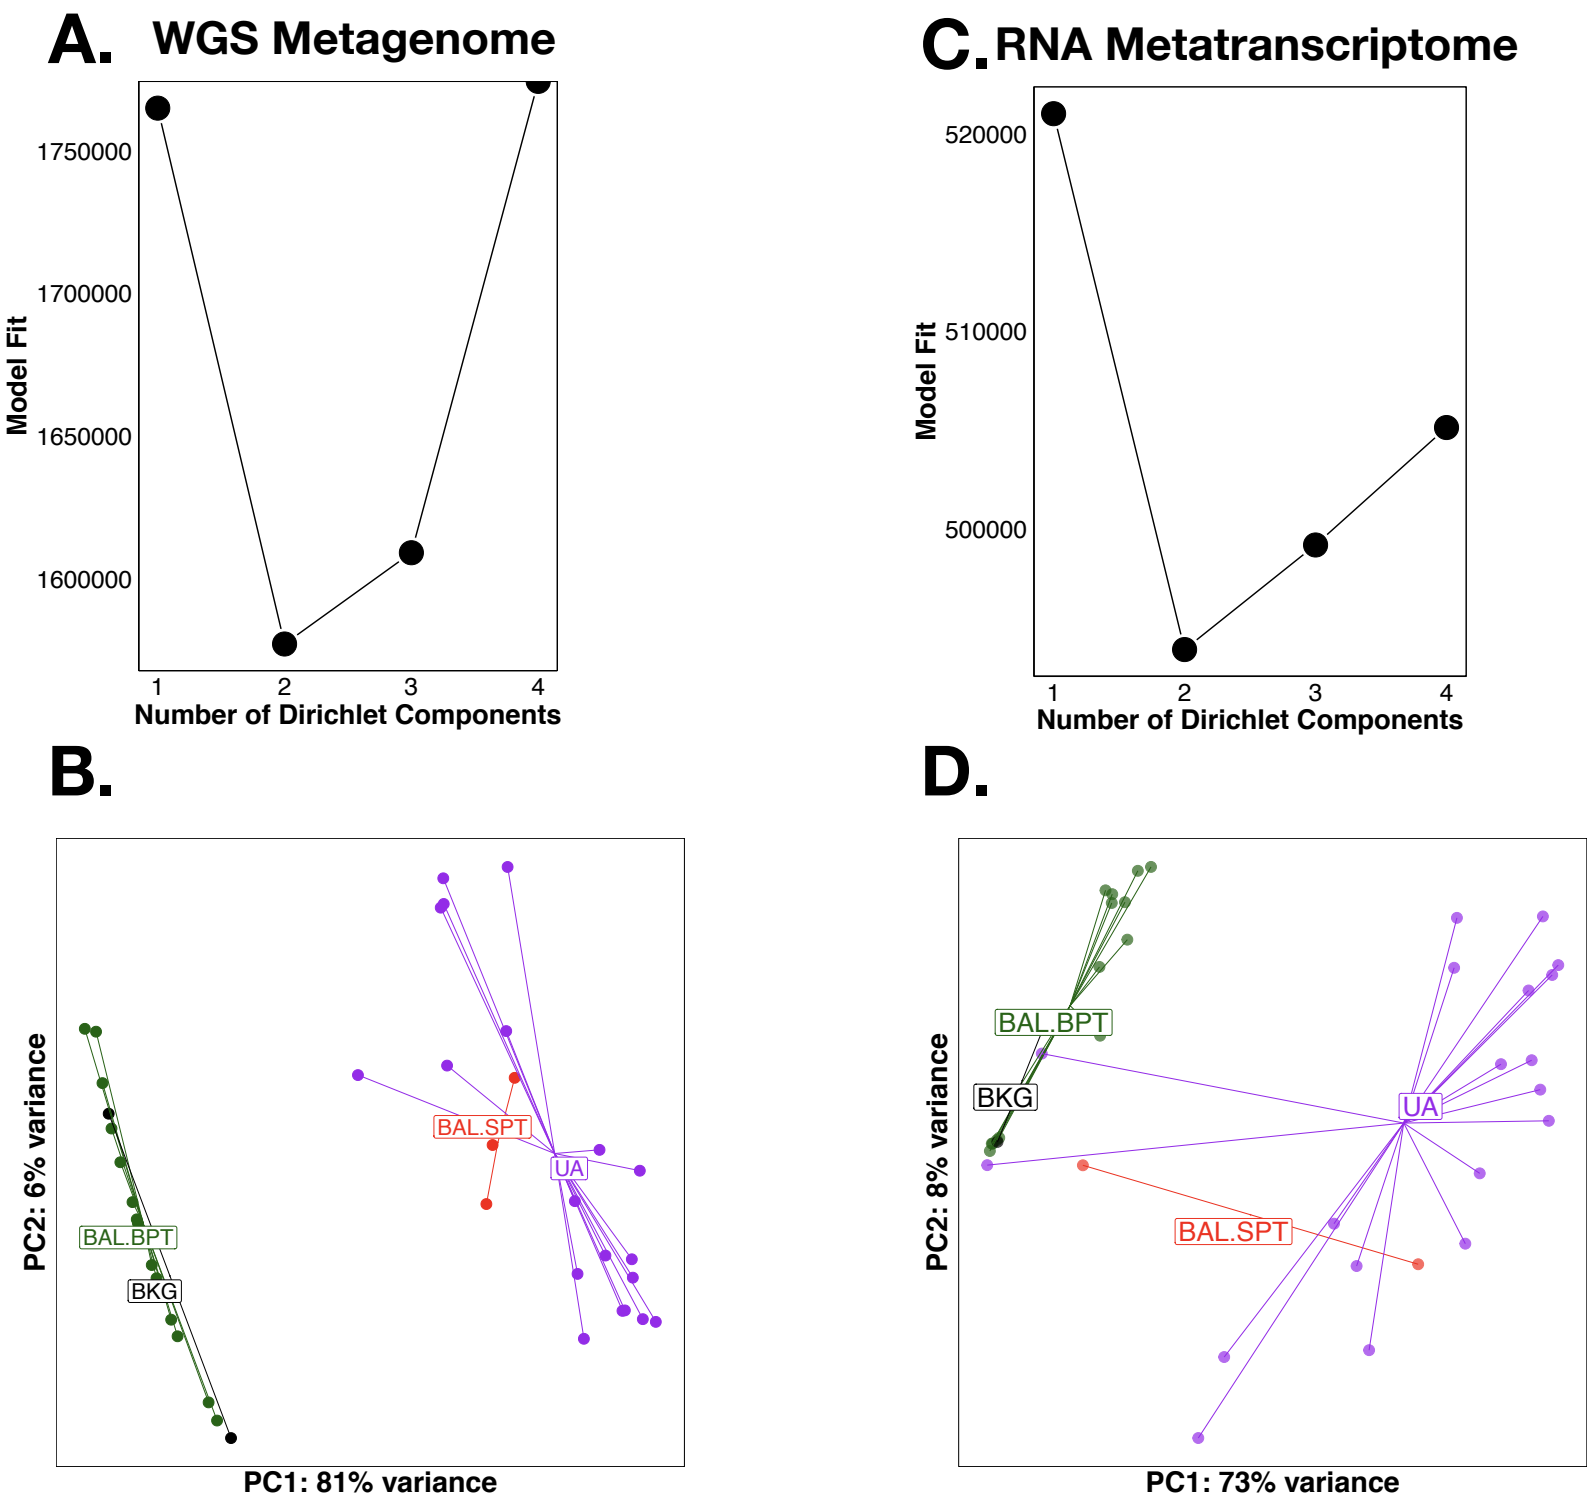



**Supplementary Figure S9: Identifying Potential Contaminants.** Using *decontam* with a threshold of 0.7, contaminants were identified based on their prevalence in BAL and Upper Airway (UA) samples when compared to Background (BKG) samples. The top taxa, identified as contaminants, median relative abundance, is displayed for the (A) 16S rRNA gene sequencing (B) Whole Genome Sequencing and (C) RNA Metatranscriptome.

SFigure 9

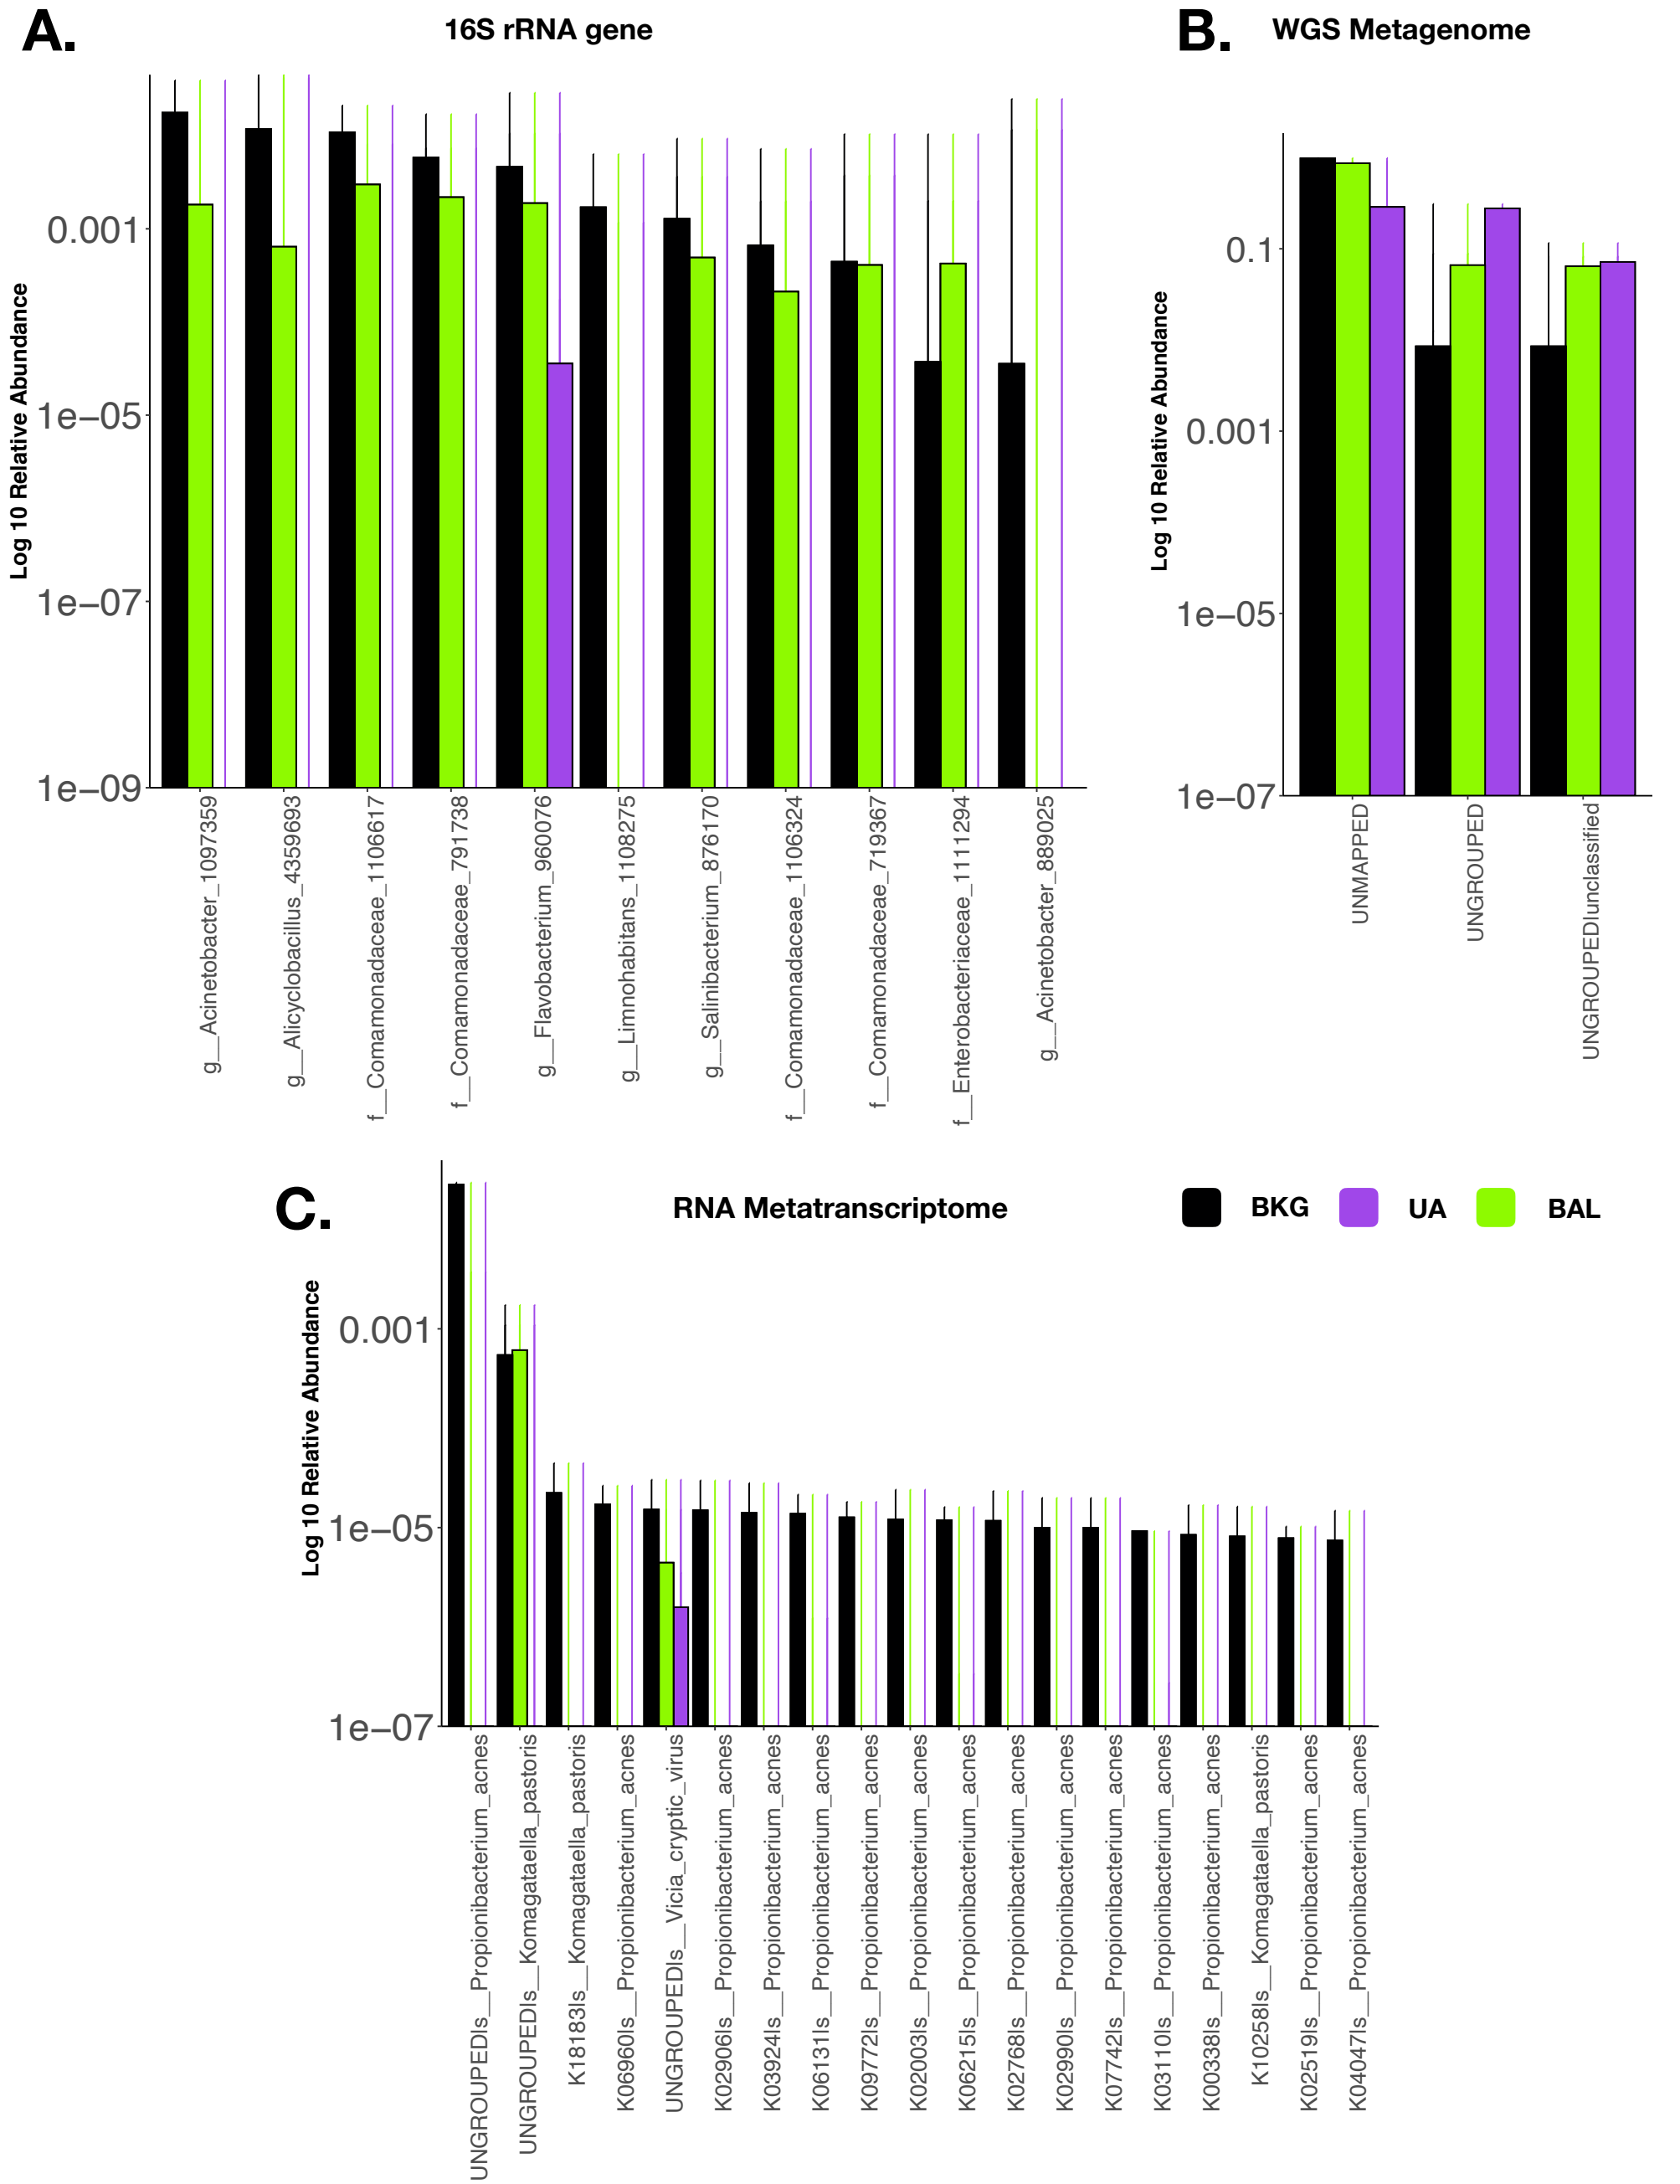

Supplement: inline-supplementary-material-2 [file inline-supplementary-material-2.pdf]
