# Supplementary material
Source: HighWire-hosted journal article supplement (https://erj.ersjournals.com/content/58/1/2003434)
Supplement: inline-supplementary-material-5 [file inline-supplementary-material-5.xlsx]

## Sheet: WGS
WGS Metagenome Functional Annotation: Comparing SPT vs BPT
KO_Number	logFC	adj.P.Val
K02954	7.88029	1.08e-19
K07024	7.84917	1.08e-19
K02015	7.44033	2.45e-19
K02904	7.37186	3.19e-19
K02982	7.33558	7.46e-19
K02992	7.29004	1.31e-18
K02013	7.14639	1.36e-18
K02909	7.16426	1.36e-18
K00790	7.12932	1.43e-18
K02986	7.2596	1.43e-18
K01624	7.05895	1.72e-18
K02967	7.07077	1.83e-18
K04567	7.03121	2.19e-18
K01923	6.99661	3.47e-18
K01951	6.97877	3.47e-18
K01867	6.97058	3.69e-18
K02988	7.0136	3.96e-18
K00948	6.94824	4.56e-18
K00059	6.92161	5.27e-18
K02926	7.00103	5.27e-18
K02946	6.90896	5.27e-18
K16787	6.9189	5.8e-18
K01866	6.88049	6.68e-18
K00761	7.00147	6.97e-18
K02895	6.89107	6.97e-18
K09458	6.86164	6.97e-18
K01756	6.85975	7.08e-18
K00088	6.82549	1e-17
K01142	6.84749	1.04e-17
K00925	6.90826	1.12e-17
K04043	6.80751	1.47e-17
K01883	6.76961	1.84e-17
K01933	6.75101	1.92e-17
K01937	6.76403	1.96e-17
K01810	6.7374	2.11e-17
K00820	6.73258	3.05e-17
K02906	6.84279	3.32e-17
K16785	6.71152	3.33e-17
K09903	6.70785	3.8e-17
K02876	6.77682	3.95e-17
K00927	6.67573	4.89e-17
K01892	6.67661	4.89e-17
K02428	6.77895	8.15e-17
K02864	6.6349	9.45e-17
K00384	6.64764	9.63e-17
K00876	6.64339	1.04e-16
K02793	6.68604	1.07e-16
K03553	6.63742	1.11e-16
K01696	6.64555	1.52e-16
K02887	6.68881	1.9e-16
K00645	6.65053	2.38e-16
K01687	6.58132	3.07e-16
K02959	6.61336	3.7e-16
K00928	6.5596	3.88e-16
K03703	6.55578	3.96e-16
K03544	6.58318	4.43e-16
K02794	6.58455	5.66e-16
K03671	6.56219	6.93e-16
K01889	6.59805	7.92e-16
K03386	6.51996	8.23e-16
K00615	6.51165	8.87e-16
K00648	6.53108	1.11e-15
K00868	6.49788	1.54e-15
K02796	6.48367	2.11e-15
K01939	6.46275	2.58e-15
K02884	6.50612	3.55e-15
K06131	6.464	3.83e-15
K02888	6.44922	3.88e-15
K02109	6.43715	5.28e-15
K00789	6.42801	5.87e-15
K02313	6.42327	6.17e-15
K00053	6.4846	7.32e-15
K01938	6.43321	7.59e-15
K03629	6.45225	1.03e-14
K00762	6.39495	1.06e-14
K01736	6.39025	1.14e-14
K00566	6.37707	1.57e-14
K00057	6.37568	2.32e-14
K08303	6.37719	2.45e-14
K00602	6.35413	2.86e-14
K00600	6.36968	3.77e-14
K02072	6.36588	3.78e-14
K02016	6.38548	4.93e-14
K01695	6.34739	5.04e-14
K17828	6.34153	6.56e-14
K01738	6.34008	6.83e-14
K00826	6.33159	8.41e-14
K11717	6.33608	9.18e-14
K02495	6.32485	1.01e-13
K01893	6.30724	1.13e-13
K03110	6.29612	1.13e-13
K01881	6.3422	1.35e-13
K01658	6.28139	1.65e-13
K03550	6.24465	4.2e-13
K06949	6.23261	5.46e-13
K03551	6.2399	7.15e-13
K01673	6.21612	8.69e-13
K01928	6.20549	9.94e-13
K03596	6.19611	1.55e-12
K01703	6.21279	1.63e-12
K02111	6.20062	1.64e-12
K01921	6.18556	1.83e-12
K01735	6.1799	2.33e-12
K02433	6.16947	2.46e-12
K00991	6.17947	2.49e-12
K02073	6.1755	2.53e-12
K02961	6.18867	3.17e-12
K02795	6.18619	4.59e-12
K03685	6.17518	4.8e-12
K01000	6.15714	5.86e-12
K02939	6.16881	5.96e-12
K01424	6.16612	6.44e-12
K00760	6.13983	7.21e-12
K01740	6.11843	8.58e-12
K03584	6.15191	1.07e-11
K09698	6.11281	1.16e-11
K01875	6.11975	1.18e-11
K01495	6.10158	1.31e-11
K05592	6.09837	1.41e-11
K04077	6.13238	1.75e-11
K02036	6.07937	2.61e-11
K01887	6.07511	2.69e-11
K00764	6.06224	3.59e-11
K01776	6.06507	4e-11
K00766	6.06154	4.18e-11
K00174	6.07649	4.88e-11
K01661	6.04921	5.66e-11
K06187	6.05421	8.9e-11
K12574	6.0428	9.23e-11
K02338	6.05616	9.6e-11
K01714	6.02404	1.04e-10
K00873	6.01174	1.33e-10
K00847	6.02575	1.7e-10
K03217	5.99689	1.87e-10
K03526	6.00605	1.88e-10
K03470	5.99077	2.63e-10
K03531	6.01258	2.74e-10
K00981	5.98511	2.86e-10
K02945	6.00636	3e-10
K01465	5.98169	3.1e-10
K00075	5.96742	4.09e-10
K09457	5.96301	6.67e-10
K02340	5.94812	6.96e-10
K03621	5.9157	1.75e-09
K01439	5.90947	1.77e-09
K01961	5.90952	2.02e-09
K01803	5.8981	2.4e-09
K01755	5.90418	2.46e-09
K01206	5.89853	2.8e-09
K00609	5.90179	3.85e-09
K02341	5.87578	4.07e-09
K00215	5.88236	5.96e-09
K02113	5.85257	7.03e-09
K03100	5.85317	7.23e-09
K02314	5.86339	7.38e-09
K01914	5.86654	9.02e-09
K00052	5.85125	1.02e-08
K01223	5.85602	1.1e-08
K03655	5.85937	1.12e-08
K01997	5.82978	1.31e-08
K00850	5.82808	1.4e-08
K01619	5.83528	1.47e-08
K01653	5.8162	1.76e-08
K02115	5.82078	2.2e-08
K00800	5.80852	2.27e-08
K00791	5.8158	2.43e-08
K00806	5.80569	2.64e-08
K17686	5.80281	2.87e-08
K01520	5.47914	2.96e-08
K00338	5.80358	3.51e-08
K00963	5.79772	3.96e-08
K01924	5.78296	5.64e-08
K00625	5.75953	6.06e-08
K02563	5.75387	6.95e-08
K01091	5.74678	8.38e-08
K01589	5.7458	9.57e-08
K18682	5.74798	9.8e-08
K01783	5.43088	1.01e-07
K01929	5.73875	1.19e-07
K01878	5.73922	1.2e-07
K00941	5.73814	1.39e-07
K01193	5.71222	1.84e-07
K01775	5.70797	2.03e-07
K03101	5.70647	2.31e-07
K00763	5.70808	2.63e-07
K15771	5.69182	3.23e-07
K00560	5.68153	3.63e-07
K00872	5.67993	5.1e-07
K00651	5.66444	6.54e-07
K09816	5.65693	7.74e-07
K06881	5.63079	1.48e-06
K00831	5.61503	1.57e-06
K03340	5.60466	1.95e-06
K01885	5.60223	2.08e-06
K07173	5.60639	2.38e-06
K02825	5.60008	2.61e-06
K03785	5.59019	2.83e-06
K00882	5.57585	3.35e-06
K09808	5.57462	3.46e-06
K01468	5.57565	3.99e-06
K00796	5.56671	4.91e-06
K02435	5.55178	5.57e-06
K00024	5.54831	6.78e-06
K06861	5.54191	7.01e-06
K01770	5.54079	8.19e-06
K00864	5.51528	1.27e-05
K00703	5.51451	1.36e-05
K11071	5.49512	1.8e-05
K07260	5.48806	2.1e-05
K04042	5.48513	2.21e-05
K11070	5.48797	2.21e-05
K17320	5.49073	2.3e-05
K02342	5.4662	3.28e-05
K00297	5.46463	3.3e-05
K00342	5.45385	4.09e-05
K07177	5.46015	4.1e-05
K10823	5.45196	4.28e-05
K10773	5.44865	5.02e-05
K03585	5.44192	5.17e-05
K01880	5.44142	5.35e-05
K01916	5.43678	6.3e-05
K01358	5.42828	6.91e-05
K04564	5.42327	7.53e-05
K03601	5.41297	9.11e-05
K01807	5.40272	0.000109835
K06041	5.3976	0.000119327
K15580	5.39819	0.000119327
K01963	5.39453	0.000128485
K01443	5.38953	0.000142223
K01739	5.39305	0.000142223
K03590	5.36701	0.00022152
K09474	5.33688	0.000353425
K16363	5.32975	0.000392691
K03587	5.3311	0.000411986
K01840	5.31892	0.000477934
K02066	5.3216	0.000487433
K03092	5.31602	0.000527277
K14260	5.29976	0.000632131
K09810	5.29236	0.000728351
K01874	5.28717	0.000816371
K17319	5.27111	0.00100546
K00549	5.26047	0.0011692
K03702	5.25534	0.00126601
K00147	5.25589	0.00126679
K01854	5.25708	0.0012871
K07718	5.25324	0.0012921
K00965	5.23901	0.00157668
K15772	5.23598	0.00168098
K02110	5.95948	0.00206753
K00162	5.21883	0.00209332
K01698	5.21769	0.00211054
K05606	5.21849	0.00215919
K15986	5.20846	0.00237035
K01839	5.21202	0.00240444
K00841	5.20695	0.00251976
K03471	5.19693	0.00273115
K14652	5.19997	0.00273115
K01745	5.17895	0.00346419
K01903	5.17532	0.00381356
K00845	5.16581	0.00407009
K01677	5.1649	0.00408324
K03784	5.16507	0.00413917
K02343	5.16233	0.00419985
K00784	5.15616	0.00474565
K00266	5.149	0.00513557
K00974	5.13174	0.00606464
K00003	5.1225	0.00668328
K13940	5.12051	0.00701267
K19302	5.11767	0.00711336
K01772	5.11678	0.00718102
K01876	6.11407	0.00750224
K11041	5.09487	0.00883968
K04517	5.09307	0.00918597
K02822	5.08832	0.00973253
K01868	5.07921	0.0106149
K00330	5.07507	0.0110024
K03385	5.07238	0.0110024
K00158	5.05978	0.0126379
K11072	5.05725	0.012948
K00364	5.04607	0.0142524
K02078	6.29017	0.0143454
K01809	5.04145	0.0144025
K00337	5.03796	0.0151482
K00705	5.0381	0.0152035
K00067	5.03394	0.015447
K01270	5.03394	0.015447
K00973	5.01941	0.0173079
K02809	5.01337	0.0180969
K02810	5.01337	0.0180969
K02892	6.14398	0.0184332
K02913	10.4615	0.0187505
K01079	5.00414	0.0195426
K02769	4.99776	0.0203844
K02770	4.99776	0.0203844
K02963	6.04501	0.0204773
K02911	7.05076	0.0213997
K01639	4.98836	0.0222616
K01586	4.98253	0.0230435
K00036	4.98165	0.0233167
K01962	4.97705	0.0239972
K01493	5.44135	0.0245876
K01635	4.97111	0.0248671
K02031	4.97422	0.0248671
K01626	4.96357	0.0265521
K02948	7.4393	0.0272264
K02040	4.95852	0.0274005
K02871	6.29334	0.0275333
K00939	6.31095	0.0279223
K01644	4.95601	0.028004
K01922	4.95239	0.0281175
K02768	4.95182	0.0281175
K03588	4.95352	0.0281175
K00949	4.95643	0.0282153
K03523	4.95115	0.0288425
K00058	4.9474	0.0292764
K09817	5.20191	0.0293798
K01886	4.94471	0.0294721
K11709	4.94751	0.0295198
K00526	5.68199	0.029719
K02952	7.33833	0.0301443
K03742	4.9429	0.0301443
K00969	4.94435	0.0302604
K18369	4.93875	0.0306637
K02899	5.70422	0.0308019
K04518	4.9333	0.0312985
K12292	4.93441	0.0312985
K01597	4.93236	0.0316196
K07706	4.93308	0.0320326
K10681	4.9311	0.0327983
K03040	7.11393	0.0344566
K02863	7.16853	0.0350664
K00016	4.91163	0.0360162
K06281	4.91254	0.0378257
K01733	4.90214	0.0382798
K15634	4.89603	0.0398262
K02890	7.06494	0.0398745
K03367	4.89229	0.0401968
K02881	6.92648	0.0413794
K00912	4.90304	0.0426155
K01956	5.81723	0.0429492
K02160	4.88582	0.0429823
K02316	4.87634	0.0445365
K02970	6.94498	0.0445365
K02916	6.768	0.0448143
K00054	4.87116	0.0453833
K02020	4.86858	0.0455728
K01187	4.87008	0.0458896
K16786	6.78894	0.0458896
K02886	6.156	0.0461653
K03046	4.86423	0.0463252
K00177	4.8768	0.0467984
K02867	5.79205	0.0478051

## Sheet: RNA
RNA Metatranscriptome Functional Annotation: Comparing SPT vs BPT
KO_Number	logFC	adj.P.Val
K02470	21.1134	1.72076e-66
K05366	22.0603	5.41375e-61
K02035	23.3172	5.90151e-60
K03070	22.0055	1.1979e-58
K00382	20.9395	1.35184e-57
K03696	21.3063	1.35184e-57
K15581	20.5968	1.02097e-56
K12574	21.1	1.26279e-56
K00527	21.564	1.86523e-56
K02469	21.0537	2.29397e-53
K01924	21.1896	3.3257e-53
K00525	20.7793	1.46804e-52
K03043	21.8973	3.37411e-52
K04759	23.1514	5.67126e-52
K00790	21.2588	7.77073e-52
K03979	19.5919	4.42832e-51
K03046	22.526	1.29332e-50
K05592	19.9248	6.08637e-50
K06147	21.1722	7.7189e-50
K08884	21.1845	3.74367e-48
K01439	20.5573	3.98638e-48
K07052	19.0984	5.07834e-48
K01000	20.5051	7.53129e-48
K00611	19.6335	1.19221e-47
K12573	20.5348	9.25811e-46
K08643	21.2715	6.85538e-44
K16787	19.7095	1.23958e-43
K03466	20.2235	1.3517e-43
K07462	20.1715	7.0019e-43
K03699	19.8798	8.55733e-43
K01950	20.8901	1.11432e-42
K00962	20.2579	1.7299e-41
K02057	20.0967	6.78573e-41
K01961	20.6332	1.02931e-40
K11749	18.7222	1.38506e-38
K00005	19.5556	5.04817e-38
K01534	20.028	4.47635e-34
K00627	18.8108	9.74603e-33
K03969	18.5626	1.60567e-26
K00975	9.1659	4.38226e-12
K01265	6.7815	1.31002e-08
K00703	7.49627	1.38748e-08
K03531	6.80446	4.35317e-08
K02529	7.18559	4.57805e-08
K02357	7.32516	7.71563e-08
K02601	6.71765	9.56659e-08
K03625	6.73708	3.33307e-07
K09013	5.53214	3.85669e-07
K02913	4.97781	5.62103e-07
K16509	6.56273	7.57559e-07
K00651	6.84398	7.64383e-07
K02316	7.29632	8.36505e-07
K10794	6.7813	8.36505e-07
K01990	7.3703	8.87527e-07
K07024	6.50598	8.87527e-07
K00688	7.70724	1.01061e-06
K02970	5.56284	1.24339e-06
K00600	7.32978	1.26305e-06
K07335	6.11248	1.28315e-06
K00820	7.4789	1.31375e-06
K01358	7.11756	1.31375e-06
K06131	7.60193	1.60046e-06
K00432	6.01207	1.69522e-06
K02935	5.89924	1.84683e-06
K06286	6.57771	1.84683e-06
K15580	6.90343	2.1667e-06
K03544	6.23283	2.17564e-06
K00700	6.53665	3.12799e-06
K00939	5.74317	3.21973e-06
K03496	7.26441	3.38093e-06
K02564	5.85061	3.56091e-06
K01537	6.11812	3.57664e-06
K01595	6.38873	3.63854e-06
K00760	5.1701	3.77614e-06
K01738	7.03465	3.90933e-06
K01462	5.61436	4.21083e-06
K14982	5.95986	4.36796e-06
K00088	6.00887	4.59704e-06
K00648	6.43913	4.59704e-06
K09903	5.66259	4.63038e-06
K01938	6.58081	4.90133e-06
K03319	7.47176	4.97338e-06
K00384	6.55915	5.1545e-06
K00615	6.12715	5.1545e-06
K02356	5.72525	5.1545e-06
K09014	6.28202	5.1545e-06
K09811	6.10575	5.1545e-06
K00059	5.89797	5.8635e-06
K02078	5.46983	6.47486e-06
K15986	6.56874	6.47486e-06
K00705	6.53307	6.7375e-06
K02796	5.83818	6.7887e-06
K00554	5.31753	7.10037e-06
K00763	5.36781	7.10037e-06
K03977	6.16058	7.10037e-06
K08600	6.0733	7.10037e-06
K03778	5.84607	7.39255e-06
K04564	5.33665	7.39255e-06
K00948	6.80283	7.89821e-06
K04074	6.54388	8.04181e-06
K00789	5.9201	8.41797e-06
K02109	5.73943	8.61157e-06
K02867	4.57731	8.61157e-06
K15371	19.006	8.61157e-06
K00560	5.48208	9.20319e-06
K01992	6.95344	9.30336e-06
K06207	5.9931	9.38946e-06
K02003	6.25628	9.71383e-06
K02888	5.94058	9.71383e-06
K02031	6.02546	1.07723e-05
K02838	4.999	1.2313e-05
K05808	5.46035	1.2313e-05
K05878	18.6275	1.30314e-05
K12267	5.9095	1.32852e-05
K03768	5.77541	1.4283e-05
K01784	5.78134	1.44718e-05
K03431	6.46787	1.44718e-05
K06997	5.7401	1.44718e-05
K07386	8.00076	1.45405e-05
K03217	5.90656	1.49158e-05
K09812	5.53751	1.53171e-05
K03702	5.69257	1.67543e-05
K08483	5.79437	1.68871e-05
K00928	5.46808	1.71677e-05
K02115	5.76701	1.90598e-05
K01803	6.30682	1.92617e-05
K02217	6.05778	1.92617e-05
K03596	6.39502	2.08252e-05
K02113	5.35467	2.1184e-05
K01893	5.54861	2.15598e-05
K02914	4.55378	2.15598e-05
K07010	5.54571	2.20686e-05
K03590	5.59674	2.24075e-05
K00057	5.65554	2.28936e-05
K18682	6.33196	2.33208e-05
K03737	6.84542	2.53455e-05
K02836	5.23153	2.77142e-05
K04077	6.38553	2.85953e-05
K01740	6.27023	2.9164e-05
K02959	5.02093	3.1662e-05
K00162	5.61552	3.2824e-05
K01673	4.84578	3.2824e-05
K09685	5.32809	3.2824e-05
K01006	6.66844	3.28455e-05
K01710	5.60106	3.28455e-05
K02794	5.42859	3.28455e-05
K01951	6.27155	3.51732e-05
K01752	5.55918	3.51957e-05
K02014	7.44416	3.58909e-05
K01262	6.66707	3.63629e-05
K03655	6.09711	3.94578e-05
K06346	4.93331	3.984e-05
K03744	5.01602	4.16308e-05
K00133	5.45156	4.28457e-05
K01142	5.26375	4.28457e-05
K01714	5.48798	4.28457e-05
K15770	5.98152	4.28457e-05
K07082	5.5045	4.3655e-05
K03073	5.5124	4.46668e-05
K02028	5.62376	4.51083e-05
K03438	5.73688	4.8495e-05
K00287	4.99958	5.03401e-05
K02314	5.5272	5.13698e-05
K04567	6.0008	5.33514e-05
K07738	4.93273	5.81942e-05
K10112	5.48506	5.87009e-05
K03701	5.979	5.90717e-05
K03168	6.12887	6.31972e-05
K00858	5.24754	6.96088e-05
K01443	5.15333	6.96088e-05
K01870	6.42251	6.96088e-05
K03569	6.00291	6.96088e-05
K09458	5.81046	6.96088e-05
K01104	5.47955	7.31716e-05
K01835	6.34918	7.63185e-05
K02319	-5.71728	7.63185e-05
K04488	5.54147	7.63185e-05
K11065	5.04655	7.63185e-05
K04068	4.88646	8.0548e-05
K02338	5.76979	8.68516e-05
K00645	5.71752	8.94353e-05
K01756	5.20042	9.05113e-05
K09772	5.00331	9.12636e-05
K11753	6.02855	9.21195e-05
K03601	5.35454	9.39016e-05
K01610	6.16208	9.74897e-05
K03734	4.97359	0.000103181
K04069	4.47205	0.000103181
K06471	-12.5342	0.000104273
K03574	4.8288	0.000105379
K00625	5.46237	0.000105454
K11068	5.6088	0.000106364
K02040	5.46727	0.000110586
K03695	7.35167	0.000112206
K04047	3.40714	0.000114781
K07056	4.74562	0.000114781
K15633	6.90905	0.000114781
K08999	5.81396	0.000115307
K01875	5.17287	0.00012437
K06217	5.00798	0.00012437
K01785	5.36931	0.000131031
K02916	4.18379	0.000135798
K00259	5.23075	0.000137222
K02004	6.28332	0.000142721
K03799	5.17093	0.000144631
K06949	4.78478	0.000144631
K01876	5.75707	0.000147648
K03500	5.51701	0.000157243
K14155	5.34044	0.000157243
K02965	4.02354	0.000158368
K00526	4.85252	0.000161242
K06901	5.61092	0.000161242
K02939	4.76152	0.000162548
K03561	6.18098	0.000169459
K06973	5.50344	0.000169459
K01881	5.45796	0.000172655
K03631	5.38413	0.000172655
K09157	5.25617	0.000172655
K09825	5.61287	0.000172655
K00558	4.95881	0.000176963
K00951	5.77013	0.000177555
K03740	6.44359	0.000177555
K07271	5.42868	0.000177555
K00981	5.18884	0.000185368
K02881	3.98225	0.000185368
K06180	5.06577	0.000193929
K10773	4.42823	0.000194843
K11991	4.48194	0.000194843
K02030	5.00997	0.000195089
K01775	5.33744	0.000195632
K07668	5.31058	0.000195632
K02343	5.16406	0.000199615
K06890	4.85787	0.000199615
K00973	4.41847	0.000199762
K01892	5.54385	0.000199762
K02919	3.57105	0.000199762
K01952	5.40005	0.000211042
K02518	3.62765	0.000211081
K02863	4.65556	0.000220789
K09760	4.82442	0.000221831
K01839	5.03276	0.000228616
K01854	4.95192	0.000228616
K03296	6.14676	0.000241235
K01372	5.59647	0.000243166
K02954	4.08423	0.000252114
K01491	5.50604	0.000260085
K00882	5.48706	0.000261628
K03282	4.66824	0.000262305
K01868	5.57623	0.000264211
K07652	5.22848	0.000264211
K01258	5.4534	0.000265045
K03629	5.33684	0.00026856
K01955	6.32583	0.000269533
K02835	5.28588	0.000272621
K00215	5.35183	0.000280374
K03088	6.11197	0.000287314
K03497	5.07754	0.000289426
K17686	6.41317	0.000296723
K02493	4.6461	0.000300789
K02892	3.17697	0.0003017
K06958	4.78698	0.000303707
K06191	4.28143	0.000304824
K01879	4.99511	0.000308491
K03584	5.11948	0.000308491
K04487	5.22963	0.000308491
K02428	5.08239	0.000322969
K03575	4.99156	0.000322969
K02313	5.00465	0.000327877
K02887	4.15618	0.000327877
K00566	5.56797	0.000328511
K01790	4.07645	0.000331176
K03671	3.09031	0.000332342
K00262	5.58446	0.000335896
K03553	5.04875	0.000341307
K00383	5.30185	0.000345702
K03657	5.43538	0.000345702
K00425	6.56257	0.000346371
K00806	4.48167	0.000346808
K03040	4.04386	0.000348775
K01153	6.84183	0.000352173
K02029	4.96634	0.000354075
K08303	5.03064	0.000354168
K00003	5.36451	0.00036368
K17828	4.84576	0.000365917
K00826	5.01583	0.000382673
K05837	4.5511	0.000382673
K02082	5.36874	0.000383981
K06178	4.6821	0.000383981
K04075	4.99698	0.000391679
K01929	4.8518	0.000393629
K01424	4.93374	0.000407468
K00075	4.90946	0.000419199
K01615	6.21021	0.000421472
K03076	4.66997	0.000424298
K03110	4.87268	0.000441229
K00074	5.37461	0.000450749
K02902	3.74186	0.000455043
K02907	3.70009	0.000455043
K00147	5.20803	0.000456625
K02118	5.99594	0.000470702
K09710	4.3245	0.000471898
K03499	4.96941	0.000487921
K00604	5.00513	0.000493796
K00868	4.73748	0.000493796
K02337	5.88697	0.000514505
K02012	4.47398	0.000528262
K04072	5.81339	0.000534088
K00762	4.21334	0.000542217
K03498	4.93564	0.000542217
K00297	5.28966	0.00055736
K01921	5.17308	0.000566554
K02033	4.89542	0.000567191
K03621	4.83523	0.000572651
K01662	5.89999	0.000572904
K01409	4.63568	0.000578671
K03624	4.07386	0.000585769
K00677	4.93637	0.000647186
K00872	4.89462	0.000647186
K03839	5.59447	0.000647186
K03439	4.62564	0.000647688
K06972	5.34519	0.000655505
K00931	4.91736	0.000665
K01575	4.93288	0.000665
K09153	4.47035	0.000665
K00891	4.41202	0.000676624
K15738	5.00396	0.000686981
K03784	4.7987	0.000692361
K02112	5.10638	0.0006962
K01956	4.98564	0.000707227
K02371	5.14662	0.00071492
K01428	6.99451	0.000735565
K03595	5.1103	0.000735656
K09817	4.70594	0.000742513
K01873	5.34362	0.000746859
K07042	4.86812	0.000767265
K04066	5.67124	0.000768024
K06023	4.98555	0.000768024
K15582	4.75352	0.000782123
K00850	4.84812	0.000796788
K01874	5.8241	0.000802827
K04094	4.80159	0.000803854
K02221	4.04796	0.000804689
K12952	5.00079	0.000804689
K00243	4.10954	0.000811339
K00161	4.70152	0.000814412
K02016	4.88783	0.000814412
K06960	3.90556	0.000814412
K07025	5.33996	0.000814412
K01791	5.34549	0.000831577
K02495	4.88207	0.000831577
K03709	4.45379	0.000839702
K10541	4.97514	0.000839702
K06153	4.97826	0.000871956
K01972	4.9605	0.000898268
K02013	4.66073	0.000912105
K01190	6.39256	0.000921436
K02039	4.77424	0.000921436
K02986	3.69581	0.000921436
K02520	3.97058	0.000922112
K01887	5.05459	0.000953338
K01923	4.78242	0.000967127
K03588	4.88155	0.000967127
K06158	4.94763	0.000967127
K01928	5.34418	0.000969446
K11754	5.09807	0.000970449
K03589	4.8516	0.000985564
K02335	5.61511	0.00099043
K02948	2.9968	0.00099043
K01937	4.92127	0.0010098
K07277	5.66216	0.00101683
K03697	5.29237	0.0010285
K03628	4.60052	0.00103284
K01619	4.65812	0.00107156
K01810	4.41176	0.00107156
K03427	5.39592	0.00107156
K03703	4.92906	0.00107156
K07478	4.50417	0.00107156
K02795	4.47095	0.00107402
K07258	4.7409	0.00107945
K15583	4.04574	0.00110026
K02073	5.87733	0.00113025
K03570	4.72861	0.00113574
K01356	4.87946	0.00113757
K01872	5.54602	0.00114101
K01621	5.84442	0.00114976
K00926	5.11121	0.00114989
K01200	5.94337	0.00115012
K13953	4.47599	0.00115012
K02528	4.38195	0.00116055
K02895	3.43883	0.00116148
K08591	4.8198	0.00116148
K07566	4.16536	0.00116276
K02988	2.93749	0.00123788
K01689	3.58152	0.00124875
K01939	4.2274	0.00124907
K00867	4.44869	0.00125166
K01869	4.93018	0.00126023
K03284	4.78989	0.00130011
K03306	4.78101	0.00130011
K07133	4.95769	0.00130242
K01156	5.66662	0.00130256
K01890	5.45691	0.00131623
K03387	5.90348	0.00132173
K15051	4.91399	0.00133084
K02086	4.52334	0.0013827
K04043	4.3339	0.00138884
K00849	5.133	0.00144453
K05895	4.35377	0.00145651
K01926	4.82698	0.00146355
K00812	5.17698	0.00148697
K13292	4.37005	0.00149275
K05896	4.04929	0.00150556
K03581	5.21745	0.00153408
K06881	4.04681	0.00153562
K04042	5.09092	0.00155246
K10823	4.14507	0.00155399
K03311	5.42824	0.00157644
K00917	4.66591	0.00159586
K01465	4.51775	0.00159586
K02990	3.59642	0.00165808
K00945	4.33615	0.00166696
K01493	3.6993	0.00166918
K02860	3.89999	0.00172081
K02032	4.35267	0.00174882
K07088	4.60251	0.00175363
K00773	4.29694	0.00175668
K00605	4.89962	0.00176719
K01759	3.98348	0.00177335
K01232	5.76702	0.0018111
K03424	4.27272	0.00184213
K00761	3.68634	0.00190402
K00602	4.98999	0.00191542
K00925	4.46434	0.00198371
K16785	4.31402	0.00201703
K01998	4.21732	0.00202095
K03286	5.71424	0.00205094
K01478	4.93296	0.00206306
K03685	4.71662	0.00208462
K00756	4.65145	0.00210682
K01867	4.51651	0.00211809
K01915	3.95862	0.00212487
K01883	4.83261	0.0021654
K00847	4.67349	0.00217858
K01270	5.37284	0.00219668
K02834	3.73189	0.00219825
K02744	4.38153	0.00221741
K06942	5.02549	0.00222673
K12257	5.91976	0.00233919
K03151	4.1522	0.00236263
K18672	4.27217	0.00236798
K00571	4.25731	0.00240094
K03832	5.11994	0.00240986
K00943	4.2993	0.00243582
K01962	5.05358	0.00247429
K00027	3.888	0.00251787
K10670	5.57271	0.00251802
K03585	4.56188	0.00252966
K01776	4.42335	0.00253792
K10914	4.5163	0.00254954
K03530	3.32987	0.00261207
K19002	4.92987	0.00270537
K07137	4.8867	0.0027072
K02600	3.54265	0.00279246
K06442	3.8235	0.00279246
K00800	4.4812	0.00283915
K01269	4.49608	0.00284334
K02034	5.25295	0.00291269
K02890	2.57535	0.00298547
K07015	3.58113	0.00300626
K02056	4.76108	0.00303427
K01897	5.64741	0.00304824
K02825	3.98128	0.00306413
K08301	4.67408	0.00307642
K01885	4.34847	0.003093
K03664	3.7671	0.003093
K07058	5.14361	0.003093
K07533	4.16604	0.003093
K10117	4.7777	0.003093
K02358	2.99542	0.00314501
K02503	3.79771	0.00316532
K11189	4.21061	0.00316532
K03665	4.17497	0.00318754
K06885	4.48223	0.00318754
K03315	4.99922	0.00321005
K00873	4.19832	0.0032197
K03783	3.98094	0.00323949
K00208	4.37221	0.00324794
K09773	4.59226	0.00327653
K03698	4.74481	0.00327812
K03770	5.38655	0.00327812
K00963	3.46631	0.00329125
K02406	5.22042	0.00329125
K06199	4.07595	0.00330292
K00764	5.02433	0.00331794
K03545	4.04735	0.00331794
K00067	4.438	0.00334598
K00791	4.3946	0.00344396
K02072	4.36771	0.00344396
K07456	4.34651	0.00344524
K02341	4.61704	0.00346821
K03386	3.00023	0.00347429
K01489	3.8025	0.0035148
K02871	3.30171	0.00357267
K19302	4.10928	0.00359024
K03106	4.41352	0.00362282
K00784	4.16092	0.00364645
K02036	4.53985	0.00377523
K02911	2.6221	0.00377523
K01090	3.99896	0.00382169
K03723	4.52376	0.00382169
K11085	4.85303	0.00384912
K00020	4.13063	0.00388081
K06193	3.45735	0.00388081
K07124	4.34714	0.00388081
K07260	4.95045	0.00388081
K07447	3.07104	0.00395226
K06896	4.79814	0.00397431
K02340	3.7168	0.00398954
K03177	4.07475	0.00411773
K11144	4.74804	0.00424708
K03402	3.85868	0.00433818
K03555	4.59624	0.0043728
K00859	3.84393	0.004389
K01653	3.14454	0.00440455
K02879	2.69623	0.00440968
K02952	2.59458	0.0044181
K02931	2.77063	0.00447857
K00841	4.84612	0.00455126
K01256	5.36563	0.00472287
K01809	4.19867	0.00472287
K03639	4.58614	0.00472287
K04485	4.0582	0.00472287
K00974	4.43082	0.00474021
K02051	4.82717	0.00474021
K07720	4.53013	0.00474021
K02433	5.01467	0.00477614
K03733	4.85206	0.00479144
K00024	4.32054	0.00480799
K07313	3.89029	0.00482211
K00134	2.98294	0.00490374
K03536	3.17762	0.00494855
K07586	3.97893	0.00494855
K00965	4.41738	0.00495172
K01223	4.10574	0.00500306
K00995	3.22558	0.00501718
K02784	5.64195	0.00501718
K03437	4.06647	0.005054
K01733	4.10403	0.00507478
K02773	5.52508	0.00507478
K12373	5.12742	0.00509314
K03118	4.36702	0.00510508
K01246	3.71587	0.00511976
K02437	4.12705	0.00518878
K13789	4.23313	0.00520493
K00346	4.98868	0.00524345
K00616	3.62444	0.00528997
K16898	4.68673	0.00531096
K07273	4.15028	0.00532967
K03501	3.48729	0.00533481
K09762	4.20373	0.00540323
K00239	4.70894	0.00540982
K02750	5.44935	0.00543142
K06173	4.2387	0.00544695
K07095	3.31175	0.00548002
K01807	4.33116	0.00548441
K08998	3.61965	0.00557039
K01925	4.5669	0.00568121
K03572	4.5586	0.00569414
K02994	2.89758	0.00579877
K12556	5.02955	0.00584639
K01754	4.19682	0.00593334
K06950	3.80682	0.00593334
K07473	3.61173	0.00595998
K01889	4.26325	0.00606336
K02536	4.34554	0.00606336
K06941	4.25742	0.00606336
K01916	4.07152	0.00611274
K02346	4.11125	0.00611274
K02909	2.74494	0.00614615
K01586	4.19731	0.00626784
K00895	4.50289	0.0062985
K02777	3.99919	0.00637458
K01963	4.63452	0.0063924
K03484	4.94751	0.00654457
K00014	4.29652	0.00656276
K03216	3.83625	0.00675741
K03704	2.6041	0.00683054
K05601	4.29523	0.00683054
K01788	3.61241	0.00707871
K02886	2.62828	0.00707871
K03798	3.63773	0.00707871
K03742	4.83109	0.00709975
K09748	3.20722	0.00719512
K06148	4.50511	0.007203
K02770	4.73847	0.00730653
K06187	3.71581	0.00733363
K01997	3.71616	0.00742104
K02110	3.65157	0.00742104
K02851	4.51255	0.00742675
K03722	4.53338	0.00748466
K06959	4.2166	0.00752791
K03739	4.41364	0.00756554
K00969	3.9461	0.00761097
K00857	3.52434	0.00771163
K01999	4.18379	0.0077386
K02342	3.7587	0.00777891
K05515	4.53687	0.00791833
K10540	4.81186	0.00793339
K01880	4.4923	0.0084395
K11175	3.53461	0.0084395
K03551	4.37287	0.00845196
K17318	5.19462	0.00848598
K02025	4.66502	0.00884917
K03100	3.91479	0.00884917
K05364	4.34106	0.00884917
K15634	3.85252	0.00884917
K07729	3.34101	0.00893965
K01914	3.75894	0.00895331
K06024	3.79578	0.00916161
K02878	2.31021	0.00917442
K07568	4.09039	0.00918357
K00876	3.77199	0.00918912
K02355	2.8447	0.00918912
K03587	4.36549	0.00919378
K02956	2.46338	0.00932563
K03075	3.63215	0.00934994
K12997	4.48215	0.0094084
K00364	3.89204	0.0094856
K03522	4.10378	0.0094856
K03060	3.34381	0.00969765
K05847	3.82528	0.00972537
K03892	3.51263	0.0097657
K01531	4.27221	0.0098403
K03481	4.85161	0.00996544
K09861	3.56851	0.00996544
K02774	3.33187	0.0102965
K02614	3.65445	0.0104986
K07718	4.94481	0.0105102
K02781	4.24427	0.0108419
K06281	4.66795	0.0109096
K02747	4.27218	0.0109438
K03322	3.67646	0.0109438
K00759	3.19736	0.0110757
K03470	3.64987	0.0110757
K04095	3.80435	0.0110819
K02071	4.50099	0.0111111
K00156	4.1574	0.0113339
K02108	3.36442	0.0113732
K17076	3.65137	0.0115472
K07570	3.6491	0.0116684
K13038	3.94026	0.011687
K07040	3.10667	0.0117288
K02864	2.79432	0.0123771
K01808	3.59482	0.0124026
K03218	3.83031	0.0124381
K02884	2.23613	0.0125073
K07007	3.28646	0.0125722
K01613	4.78818	0.0126847
K16089	5.12359	0.0128659
K00609	3.37478	0.0129651
K09815	3.94651	0.0129651
K00036	4.10461	0.0129687
K05846	3.77249	0.0131473
K02621	4.22163	0.0132371
K02429	5.03037	0.0134069
K00674	3.73624	0.0135683
K02779	3.67213	0.0136236
K09816	3.50276	0.0136236
K18707	4.09923	0.013893
K02899	2.37306	0.0139446
K03367	4.24995	0.0140142
K02793	3.56861	0.0141935
K00845	3.35627	0.0142309
K02434	3.71609	0.0142467
K00991	3.93887	0.0142736
K04757	3.6533	0.0142819
K06168	4.13091	0.0144519
K02190	4.13234	0.0144645
K03529	4.40364	0.0144995
K00656	2.74478	0.0145821
K09747	3.49609	0.0147357
K02027	4.12929	0.0148734
K03654	4.41118	0.0148734
K03976	3.37999	0.0148734
K10254	3.97353	0.0150701
K02761	4.19444	0.0150898
K03111	2.81753	0.0151243
K02010	3.60323	0.0151399
K03526	4.08447	0.0152388
K14652	3.88481	0.0153348
K02015	3.90696	0.0154852
K03978	2.84225	0.0155282
K12555	4.11744	0.015848
K00949	3.49132	0.0158907
K01284	4.49524	0.0159343
K11705	3.02107	0.0159343
K06183	3.43221	0.0162796
K03152	3.37678	0.0165314
K03475	3.77718	0.016581
K01338	4.41433	0.0166168
K01215	4.47768	0.016719
K07444	3.01926	0.0167652
K00540	3.59978	0.0171786
K03495	4.06953	0.0177224
K08602	3.90099	0.0179679
K09761	3.55789	0.0179679
K01591	3.40229	0.0182079
K03215	3.68998	0.0182079
K07282	3.88643	0.0182079
K00655	3.58351	0.0182527
K01649	4.26704	0.0184129
K02783	4.69293	0.0184588
K00831	4.07803	0.0187853
K01495	3.44726	0.0189691
K08681	3.59862	0.0190116
K01007	5.00364	0.0191123
K02563	3.38883	0.0191123
K05352	4.05429	0.0191518
K07173	3.37108	0.0193586
K03650	3.45132	0.0196419
K01840	4.53356	0.0200333
K03101	3.45601	0.0201514
K02950	2.05095	0.0201723
K02822	3.35451	0.0202482
K01960	4.33572	0.020391
K03785	3.99566	0.0204033
K02874	1.87447	0.020618
K15771	3.8463	0.0216263
K03797	4.56643	0.0218362
K17074	4.25471	0.0219357
K01515	3.72915	0.0223193
K01886	3.89398	0.0223193
K06878	3.54894	0.022449
K03620	3.97416	0.0230418
K00374	3.95375	0.0230429
K06861	3.82421	0.0230429
K07898	-9.44171	0.0233346
K07029	3.74908	0.0233579
K01091	3.545	0.0233807
K02837	3.76264	0.0233807
K04083	3.89797	0.0241098
K18474	3.75727	0.0243743
K13678	3.92675	0.0247303
K01588	3.1076	0.0248534
K03366	3.39489	0.0248583
K06287	3.49727	0.0248583
K07560	3.61681	0.0248583
K09015	3.90004	0.0249044
K18928	3.76065	0.0249241
K00266	3.47554	0.0249342
K07816	3.40942	0.0250138
K07085	4.18729	0.0252475
K02111	2.94591	0.0254063
K00198	4.55575	0.0260235
K02967	2.71403	0.0260235
K03711	2.89662	0.0260651
K14188	3.16456	0.0260651
K02946	1.95611	0.0261629
K00794	3.41649	0.0262613
K01533	4.09091	0.0267647
K02517	3.72544	0.0267647
K10672	4.35866	0.0267647
K09155	3.53426	0.0272096
K09819	3.4205	0.0286301
K01736	3.71781	0.0288101
K01933	3.65064	0.0288101
K07588	4.34551	0.0288101
K00640	3.12628	0.0288939
K01243	2.71667	0.0288939
K03294	3.80836	0.028902
K07223	3.80223	0.028902
K01819	3.85397	0.0290341
K09940	3.91522	0.0291137
K07220	3.32114	0.0292539
K18692	3.77057	0.0292539
K03340	3.73494	0.0295446
K00131	4.0845	0.0297287
K03925	3.19822	0.0297287
K14983	2.58159	0.0300853
K02810	3.67542	0.030467
K03312	3.6778	0.0305704
K02897	2.85942	0.0309772
K04078	2.43775	0.0310338
K01735	3.57873	0.0315592
K02823	3.06144	0.0316513
K17103	3.3863	0.0318051
K01679	4.15731	0.0322355
K02996	2.02343	0.0322427
K03602	2.53285	0.0322958
K06969	3.12875	0.0322958
K00290	4.33985	0.0323472
K06041	3.35228	0.0323472
K03527	3.83134	0.0327914
K00012	3.92988	0.0330254
K09698	3.75576	0.0333272
K02526	3.93387	0.0333555
K07491	3.116	0.0337309
K03800	3.82259	0.0342461
K03924	4.22357	0.0348283
K06142	3.53139	0.0350373
K12308	3.86753	0.0364189
K11618	3.5606	0.0366156
K01996	2.863	0.0367713
K02557	4.17909	0.0368396
K01274	3.55793	0.0369775
K14540	3.37419	0.037591
K01703	3.29218	0.0376741
K01159	3.16325	0.0377772
K02992	2.11112	0.0377772
K03523	3.5208	0.0377772
K00927	2.58433	0.0380589
K03308	3.58254	0.0380914
K01945	3.86057	0.0382177
K03686	2.41283	0.0382177
K04744	4.05168	0.0382177
K01299	3.47009	0.0386019
K01878	3.30319	0.0386019
K02906	1.95812	0.0386019
K03086	2.57769	0.0386019
K13993	2.91177	0.0386019
K16092	4.07172	0.0386019
K07404	3.65525	0.0386095
K00833	3.87743	0.0386755
K03565	3.24755	0.0386755
K03706	2.5578	0.0390323
K05833	3.12232	0.0391712
K00260	3.92099	0.0396371
K00639	4.04318	0.0396371
K01129	3.4842	0.039996
K14260	3.42587	0.0403897
K02945	2.44043	0.0403931
K00054	4.04957	0.0405167
K00004	3.9497	0.0406005
K07183	3.09552	0.0412994
K00240	3.16261	0.0414827
K07272	4.07451	0.0420859
K03313	3.40056	0.0429059
K01448	2.6091	0.0435765
K00058	3.46995	0.0437204
K06196	3.58569	0.0439853
K00941	3.59119	0.0440199
K07146	2.77428	0.044864
K05810	3.56704	0.0449392
K00864	3.72167	0.0450934
K02876	1.97197	0.0456818
K16511	3.12209	0.0456818
K03327	3.67112	0.0457276
K01176	3.42849	0.0458962
K07284	3.27815	0.0458962
K00721	3.2738	0.0459609
K18929	3.8994	0.0464421
K01847	4.40769	0.0465927
K02011	3.092	0.0465927
K02026	3.34125	0.0465927
K07009	2.88726	0.0466487
K00174	4.19258	0.0471985
K02188	3.6141	0.0476908
K07166	2.45044	0.0477792
K04517	3.75078	0.0478547
K10563	3.51025	0.0490322
K11710	4.06324	0.0490322
K01598	2.99793	0.049155
K12996	3.33885	0.0500006
K01677	3.67883	0.0504341
K03324	3.32533	0.0504341
K16363	3.65504	0.0505641
K02117	4.13055	0.0507515
K03816	2.81394	0.0507515
K01644	3.85391	0.0515072
K01193	4.12637	0.0516619
K11069	3.10081	0.0516866
K00942	2.25213	0.0519061
K03303	4.00804	0.0519061
K09949	3.35599	0.0519061
K01596	3.19168	0.0531045
K02926	1.98887	0.0534919
K16786	3.57727	0.0536839
K18892	3.87111	0.0544805
K08987	3.05172	0.0549543
K03710	3.0614	0.0551749
K00748	3.4893	0.055679
K02622	3.49688	0.055679
K19350	4.26124	0.055679
K01101	2.82045	0.0562967
K02492	3.42557	0.0564789
K01744	3.50303	0.0568643
K02038	3.046	0.0572705
K02334	3.90571	0.0575308
K02523	3.40985	0.0577434
K05807	3.82309	0.0578946
K13049	3.47299	0.0578946
K01958	5.08105	0.0580436
K11717	2.65405	0.0587588
K01641	3.7492	0.0588415
K01627	2.93449	0.0589507
K03773	3.48686	0.0589507
K02114	1.90127	0.0594668
K11050	3.89985	0.0608077
K00912	3.24695	0.0609642
K02961	1.91523	0.061978
K05832	3.11054	0.0619928
K01623	4.10247	0.0621073
K00954	2.97984	0.0623893
K08302	2.60098	0.0630258
K02065	3.33825	0.064163
K07062	3.74442	0.064163
K00971	3.39245	0.0643299
K02519	2.88825	0.064599
K02669	3.29105	0.0653216
K01155	2.93889	0.0653565
K16301	3.86791	0.0654147
K03521	3.17401	0.0656678
K08313	2.72065	0.0656678
K01281	4.00409	0.0657673
K01639	3.12144	0.0663069
K00783	2.71101	0.0664316
K01322	3.89648	0.0664316
K00286	3.23742	0.0666952
K01488	3.04167	0.0666952
K03346	3.70714	0.0666952
K00342	3.5029	0.0668527
K11145	3.06455	0.067233
K04079	3.62671	0.0677366
K11072	2.87597	0.0685015
K03549	3.19727	0.0686153
K02530	3.42336	0.0687474
K02963	1.5594	0.0692414
K01154	3.22108	0.0693965
K01940	3.31384	0.0694671
K03442	3.36561	0.0694671
K01991	3.68372	0.0697273
K01304	3.22499	0.0699589
K03471	3.19023	0.0701474
K04758	2.63555	0.0702866
K01903	3.14264	0.0703528
K01267	3.0101	0.0708305
K09704	3.30716	0.0713312
K16211	3.49277	0.0730667
K07006	3.77282	0.0753339
K03502	3.47314	0.0756017
K02372	2.6458	0.0758434
K03763	3.458	0.0758434
K00033	3.11291	0.0760931
K12410	2.6196	0.0773625
K03644	3.05392	0.0780012
K06188	2.6946	0.0785839
K07670	3.26636	0.0790023
K02120	3.44792	0.0803808
K07243	3.94527	0.0816454
K01206	3.75635	0.0817598
K03469	2.92826	0.082516
K00426	3.44816	0.0831725
K07230	3.51254	0.0840601
K07263	5.23627	0.0840601
K07164	2.9104	0.084703
K03305	3.16358	0.0871937
K00661	2.3703	0.0879532
K01783	2.26681	0.0882118
K01585	3.32494	0.0883585
K03693	3.67256	0.0885284
K08972	2.92908	0.0885284
K02904	1.66914	0.0885893
K00341	3.91765	0.0896595
K00029	3.53506	0.0898044
K01494	2.58431	0.0901271
K09820	3.10634	0.0901271
K13378	3.68401	0.0901271
K03771	3.68095	0.0902475
K11253	-4.72907	0.0909806
K01271	2.88659	0.0930343
K07067	3.06167	0.0930343
K11601	3.93846	0.0930343
K12269	4.54516	0.0932216
K01751	3.63085	0.0937663
K00979	2.77516	0.0948215
K03708	2.77112	0.0948215
K09800	3.28539	0.0948215
K11709	3.14061	0.0954867
K03492	2.48682	0.0962425
K01071	3.40063	0.0962775
K16169	2.8157	0.0963872
K00537	3.11553	0.0972023
K03718	3.12632	0.0981019
K01737	2.2242	0.0988615
K02652	3.34393	0.099193
K01995	2.22159	0.100551
K00099	3.23587	0.102704
K00832	3.04908	0.102786
K04041	3.51027	0.103931
K09818	2.75411	0.10394
K13821	3.76909	0.10394
K02067	3.2345	0.104066
K00175	3.24539	0.105276
K02775	3.1578	0.105276
K08218	3.74402	0.106263
K03647	2.61081	0.107613
K02745	2.49583	0.107763
K00241	2.76511	0.107854
K01520	1.89758	0.107854
K03436	3.51275	0.108554
K03767	3.26394	0.108554
K06948	2.77278	0.108554
K16264	2.7167	0.108554
K06412	2.82201	0.108987
K07704	3.10776	0.110166
K03123	-6.64043	0.110286
K03684	2.87171	0.110941
K03975	2.74401	0.110941
K11704	1.87837	0.111384
K03289	3.22985	0.111569
K07316	3.64798	0.111624
K00938	3.18941	0.112507
K01778	2.53367	0.112507
K07091	3.44184	0.112507
K12297	3.67319	0.112507
K05946	2.91634	0.112753
K04720	2.83103	0.113384
K03550	2.31219	0.11383
K00687	3.12541	0.114218
K03885	3.12936	0.115139
K03750	3.27641	0.115167
K16149	4.6318	0.115388
K01464	3.36623	0.115827
K01760	2.76123	0.116357
K04763	2.88325	0.116434
K03524	2.97239	0.116667
K03823	2.56874	0.116785
K09808	3.44136	0.116785
K01845	3.27019	0.117044
K15554	-6.48922	0.117553
K03095	2.45832	0.117903
K01277	3.37707	0.118093
K01589	2.71859	0.118093
K05985	2.40967	0.118093
K02933	1.53269	0.118328
K01092	3.18638	0.118415
K01698	3.18848	0.11857
K01711	3.13917	0.11924
K02527	3.61694	0.119369
K03272	3.34106	0.119848
K16868	3.04726	0.120335
K01918	2.60475	0.120454
K02440	2.39805	0.121069
K01278	4.48853	0.122976
K03116	2.03961	0.123029
K00343	3.36869	0.123059
K00351	2.87101	0.12312
K11070	2.74123	0.124129
K00226	2.61538	0.126304
K17320	3.1146	0.126304
K01507	2.71649	0.126664
K10119	2.77494	0.127982
K01719	2.85182	0.127992
K17267	-6.29102	0.128563
K06962	2.57055	0.130318
K00350	2.98418	0.130397
K03788	3.21598	0.130397
K07270	3.41592	0.130518
K12960	2.62945	0.13224
K04761	3.27035	0.132888
K01625	2.52219	0.134125
K00937	3.10025	0.134408
K03310	3.33036	0.134642
K05337	2.43291	0.134803
K18698	-2.05512	0.13615
K05593	2.35844	0.136371
K04477	2.55388	0.136669
K01989	3.15761	0.139581
K00282	3.16515	0.140324
K00347	3.18567	0.140324
K03700	1.81774	0.140324
K19005	3.17816	0.141741
K06201	3.11775	0.144339
K01895	3.1489	0.14465
K07114	3.16014	0.148834
K03293	2.70773	0.149034
K07862	2.8601	0.149819
K02006	2.50592	0.150065
K00797	3.14632	0.150908
K03980	2.63376	0.151596
K02224	2.85459	0.151945
K00561	3.39888	0.152757
K01745	3.32007	0.152757
K09963	2.63485	0.152757
K07480	-5.54554	0.153
K01163	2.65262	0.153409
K07341	2.61709	0.154476
K11707	2.85016	0.156261
K01060	2.53675	0.156491
K17836	-2.18268	0.1571
K04767	2.64802	0.158902
K07757	2.4074	0.161923
K13747	2.93791	0.161955
K03930	3.02115	0.16207
K08659	2.72695	0.162944
K13052	2.3486	0.162944
K03648	2.20133	0.163092
K00997	2.14044	0.164744
K02020	2.41768	0.166195
K15923	3.22257	0.166887
K03458	2.73864	0.167205
K02687	2.466	0.168391
K00048	2.74235	0.168846
K05362	2.75817	0.168991
K14441	2.936	0.169092
K02703	-5.64178	0.169436
K11071	2.50609	0.169436
K05823	2.92657	0.170336
K03525	2.492	0.172093
K01676	3.16119	0.17252
K15977	2.46882	0.173341
K11358	2.69347	0.173743
K07407	2.97347	0.174134
K07224	2.87212	0.175142
K07322	2.58525	0.175174
K01681	2.71191	0.176216
K01079	2.52007	0.176438
K01571	3.14982	0.176484
K02982	1.2182	0.176525
K00613	2.71826	0.176952
K00348	2.58343	0.179742
K04516	2.14036	0.180598
K09780	2.3369	0.181674
K00001	2.16596	0.181801
K00782	2.42541	0.182857
K12524	2.86038	0.182921
K01716	-5.48596	0.184848
K01770	2.40267	0.184848
K02968	1.36452	0.185177
K03564	2.3072	0.185177
K07030	1.58106	0.190395
K03090	2.39976	0.190642
K03385	2.8135	0.191206
K16924	2.5662	0.191841
K12349	3.13267	0.191959
K00796	2.39223	0.19302
K01624	1.62441	0.194005
K00164	2.99084	0.196034
K16345	3.00701	0.199275
K10542	2.23448	0.199305
K01866	1.71193	0.199939
K07139	2.06155	0.199939
K02843	2.38929	0.200798
K02759	2.18585	0.201497
K00097	2.6044	0.201693
K03316	2.70828	0.202239
K01849	2.4152	0.202669
K02077	2.63097	0.202691
K04518	2.57484	0.202691
K03048	2.3047	0.204
K09457	2.20279	0.205561
K01056	2.13134	0.207184
K05516	2.30697	0.210338
K03183	2.45348	0.212066
K07584	1.09368	0.213957
K03593	2.48193	0.216851
K00680	2.23322	0.217403
K00887	2.30425	0.218284
K00940	1.92575	0.218284
K01848	3.04628	0.222412
K03786	2.05446	0.224
K09474	2.49557	0.22547
K04561	2.61194	0.226548
K19272	-1.56412	0.227414
K00281	3.0079	0.227733
K03630	2.07221	0.233034
K00231	2.22888	0.233639
K01081	2.14038	0.233639
K07089	2.22051	0.233639
K10040	2.63407	0.233639
K01468	2.78769	0.234016
K01652	1.59556	0.234016
K17759	2.79295	0.234016
K01012	2.30686	0.235129
K01597	2.60206	0.235135
K03687	1.38071	0.23671
K04773	2.76716	0.23671
K03457	2.57534	0.240333
K13643	2.46256	0.240333
K07483	-1.39858	0.241206
K00757	2.27279	0.241672
K01599	2.34986	0.242515
K01704	1.87517	0.246749
K01635	2.46384	0.249131
K13990	2.89526	0.249162
K01749	2.16203	0.250522
K07304	2.31733	0.250686
K07461	1.7908	0.250686
K00283	3.62404	0.250738
K00459	2.52869	0.252126
K00548	2.514	0.252126
K02007	2.21519	0.253136
K02066	2.32837	0.253666
K06409	2.63765	0.254353
K13677	2.02458	0.254462
K01934	1.86675	0.259411
K10716	2.38639	0.259411
K03270	2.07217	0.260092
K16789	2.28538	0.26269
K01572	2.42704	0.263236
K13542	2.82542	0.263444
K00919	2.07673	0.264724
K00052	1.95802	0.265318
K03169	2.22572	0.265318
K07707	2.43984	0.265318
K00336	2.39707	0.269118
K00330	2.05692	0.269569
K00373	2.41053	0.269569
K12268	2.69912	0.270861
K02160	2.16778	0.271383
K09125	2.07397	0.271994
K03790	1.63792	0.273233
K07387	2.3839	0.273233
K18888	2.54303	0.273299
K01858	2.56341	0.275796
K07391	2.42032	0.278326
K09765	-1.36184	0.280897
K16926	2.3473	0.280933
K16899	4.19899	0.283364
K01524	2.13675	0.287209
K01647	2.49993	0.288495
K01361	4.19318	0.289547
K10039	2.19133	0.291232
K11209	2.04328	0.291589
K13940	2.00797	0.291589
K09791	-2.94458	0.292047
K00549	2.17172	0.29239
K03605	1.86558	0.292613
K01207	1.97495	0.292933
K01151	1.93756	0.296867
K03082	1.94891	0.298492
K03713	1.40006	0.298672
K00337	1.98061	0.299324
K14742	2.27183	0.301583
K02377	2.4327	0.304431
K00363	2.34463	0.304549
K01626	1.63169	0.304549
K06282	2.38407	0.307538
K00567	1.90432	0.310472
K02484	2.61947	0.3132
K01755	2.20619	0.316708
K03453	2.06247	0.316708
K02483	1.86913	0.319931
K00606	2.02392	0.322202
K03399	2.0339	0.325178
K08974	1.98451	0.326616
K02575	2.47345	0.329179
K04771	1.70145	0.331962
K00989	1.62939	0.332601
K00331	2.14136	0.335374
K04026	2.453	0.337762
K01186	2.61923	0.338345
K18118	2.44815	0.339049
K01661	1.90793	0.339587
K00376	2.63054	0.341501
K11382	2.40726	0.343401
K00349	2.07915	0.344028
K06001	2.06773	0.345134
K00528	1.89908	0.345755
K01187	2.40546	0.346402
K01922	2.31308	0.347741
K01739	2.10441	0.349062
K01823	1.74912	0.349261
K02788	2.44077	0.349261
K09758	3.57431	0.349911
K07405	2.19814	0.350095
K05934	2.17352	0.352264
K00016	1.02468	0.35535
K06920	1.96779	0.355728
K12554	2.21336	0.356407
K01919	3.52315	0.357057
K19165	1.8629	0.357057
K19221	2.18864	0.357057
K00865	2.02931	0.35935
K01678	2.16278	0.362143
K07636	2.0152	0.362143
K10530	2.28683	0.362143
K11031	2.16998	0.3625
K01197	2.48395	0.364021
K08289	2.15294	0.364109
K00338	1.78702	0.36426
K03571	2.03757	0.36426
K03476	2.16571	0.367861
K02425	-3.48146	0.368485
K03210	0.906621	0.368485
K02230	2.10584	0.369013
K06929	0.977762	0.371301
K03404	1.81866	0.372172
K09891	-3.48107	0.383074
K07177	2.04794	0.383752
K03705	1.22466	0.383992
K14445	2.21655	0.383992
K03743	2.22376	0.384694
K07776	1.96507	0.385719
K06136	-3.48092	0.388244
K07660	-3.48092	0.388244
K08305	-3.48091	0.388244
K07305	1.37182	0.395078
K07496	1.89666	0.395078
K07739	1.84686	0.395078
K01695	1.69177	0.395513
K07027	2.16651	0.396513
K03486	1.81707	0.402017
K07037	2.12513	0.403247
K03667	2.19411	0.404312
K00068	2.02542	0.412067
K03332	1.92073	0.412882
K07150	1.72157	0.412884
K01696	1.79234	0.421147
K03736	2.84432	0.423018
K18891	2.91482	0.426279
K02824	1.07665	0.42849
K00127	2.06924	0.429304
K03394	2.0614	0.435571
K07701	-2.58265	0.435666
K19134	2.74498	0.435666
K10974	2.74302	0.437834
K01486	1.98483	0.442805
K01786	1.96988	0.443341
K02075	2.02191	0.445785
K06926	3.02089	0.447715
K01480	2.11286	0.447758
K02074	2.1291	0.450431
K00135	2.99491	0.450511
K03491	2.99551	0.450511
K00013	2.95167	0.457116
K07034	2.04334	0.464035
K01834	0.777597	0.465823
K11720	1.84492	0.474325
K18216	1.99789	0.477823
K06915	2.13804	0.481264
K00158	0.993123	0.487621
K01654	2.72756	0.491241
K06889	1.27481	0.491241
K00370	2.65225	0.503449
K08167	2.62205	0.508209
K14645	1.99676	0.509115
K00691	1.88823	0.511278
K13288	1.35684	0.511305
K03735	2.58053	0.513778
K15987	1.98074	0.514624
K04030	1.78497	0.527136
K06940	0.865257	0.52906
K03558	-1.97191	0.53044
K06200	2.02613	0.539404
K01191	2.39081	0.543928
K15584	2.01183	0.543928
K18955	0.775119	0.543928
K05363	1.78397	0.560971
K07452	2.28822	0.560971
K00244	2.27288	0.563256
K07654	2.22064	0.572212
K01902	1.02888	0.573215
K18217	1.86631	0.577882
K15772	0.836911	0.601309
K03273	0.859312	0.658658
K03559	0.79416	0.661364
K03756	1.1643	0.674491
K11706	0.568066	0.685072
K15256	1.5657	0.69155
K07552	0.864033	0.698743
K11251	-0.74043	0.702139
K06925	-0.457219	0.715615
K01687	0.520574	0.728869
K00009	1.26927	0.747421
K00901	0.447204	0.775295
K01420	0.452696	0.776438
K02760	0.365359	0.783166
K01579	-0.515101	0.78654
K00053	0.296504	0.801411
K08151	-0.927051	0.809437
K01419	0.342763	0.894904
K06215	0.202105	0.897118
K07497	0.205572	0.897264
K09022	0.190824	0.90058
K00647	-0.184319	0.921444
K04086	0.0868143	0.946816
K02037	0.0691803	0.961876
K05311	0.0210161	0.995618
